# Supplementary material for: HONO measurement by differential photolysis
Source: Copernicus journal article supplement (doi:10.5194/amt-9-2483-2016), 2016-06-07
Supplement: Supplementary file 1 [file amt-9-2483-2016-supplement.zip]

Archive with 4 entries (4 files):
- WAO_timeseries.csv
- amt-2016-17-supplementary.pdf
- amt-9-2483-2016-supplement-title-page.pdf
- HIRAC_timseries.csv
