# Supplementary material for: HONO measurement by differential photolysis
Source: Copernicus journal article supplement (doi:10.5194/amt-9-2483-2016), 2016-06-07
Supplement: Supplementary file 1 [file amt-9-2483-2016-supplement.zip › amt-9-2483-2016-supplement-title-page.pdf]

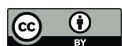

## *Supplement of*

## **HONO measurement by differential photolysis**

**Chris Reed et al.**

*Correspondence to:* Chris Reed ([chris.paul.reed@gmail.com](mailto:chris.paul.reed@gmail.com))

- [amt-9-2483-2016-supplement-title-page.pdf](#)
- [HIRAC\\_timseries.csv](#)
- [WAO\\_timeseries.csv](#)
- [amt-2016-17-supplementary.pdf](#)

The copyright of individual parts of the supplement might differ from the CC-BY 3.0 licence.
