# Supplementary material for: HONO measurement by differential photolysis
Source: Copernicus journal article supplement (doi:10.5194/amt-9-2483-2016), 2016-06-07
Supplement: Supplementary file 1 [file amt-9-2483-2016-supplement.zip › amt-2016-17-supplementary.pdf]

## Supplementary Information

1 pHONO data in stable conditons.

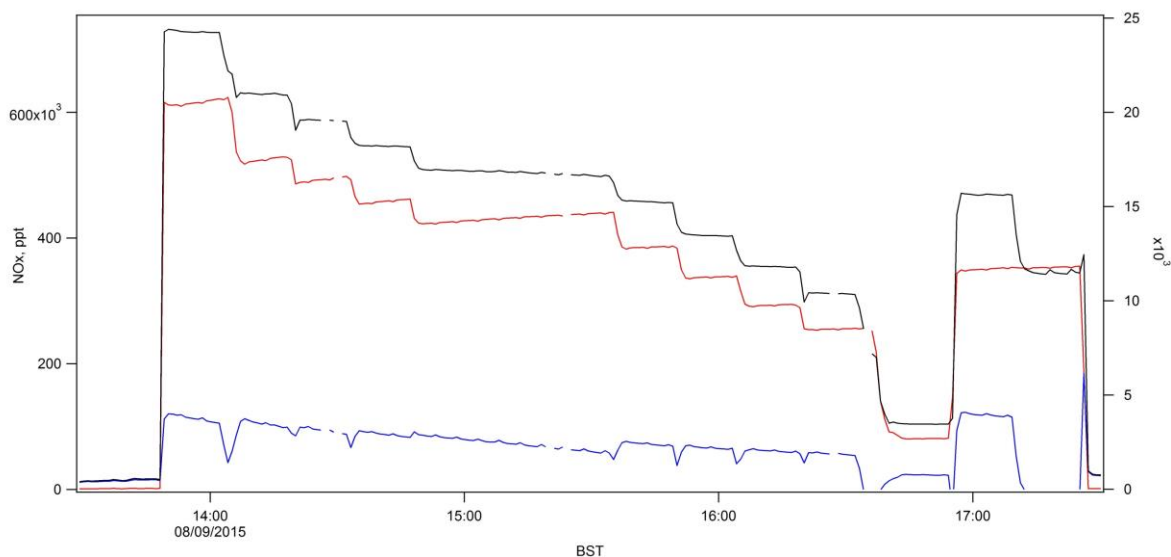

Figure 1. NO (red), NO<sub>2</sub> 395 nm (Blue) and NO<sub>x</sub> measured in the HIRAC chamber during HONO comparison with FT-IR.

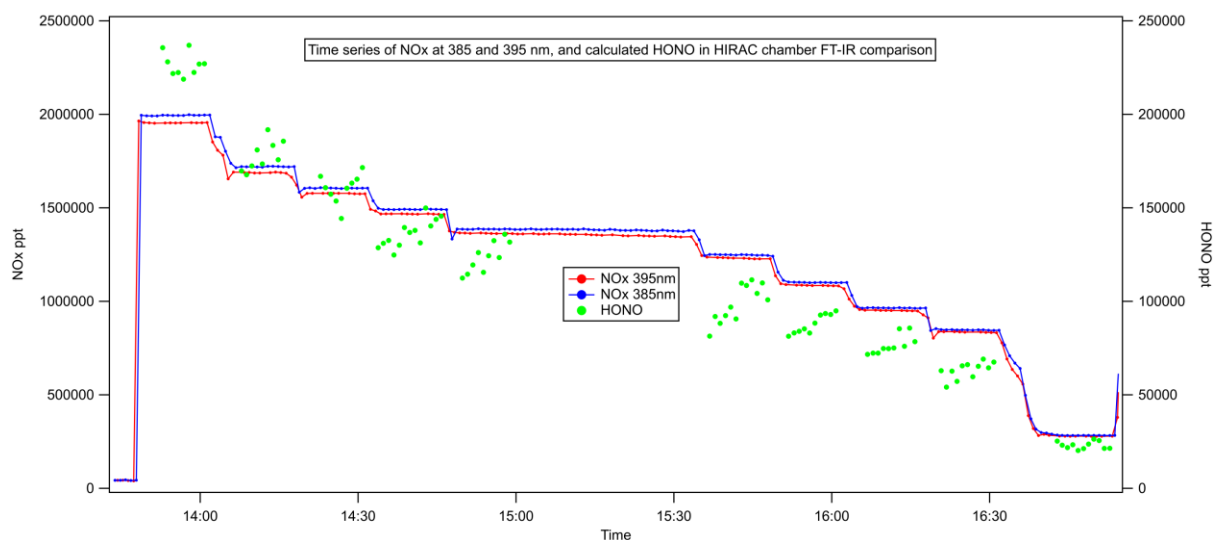

Figure 2. NO<sub>2</sub><sup>†</sup> 385 nm (blue), NO<sub>2</sub><sup>†</sup> 395 nm (red), and derived HONO (green) in the HIRAC chamber during FT-IR comparison.

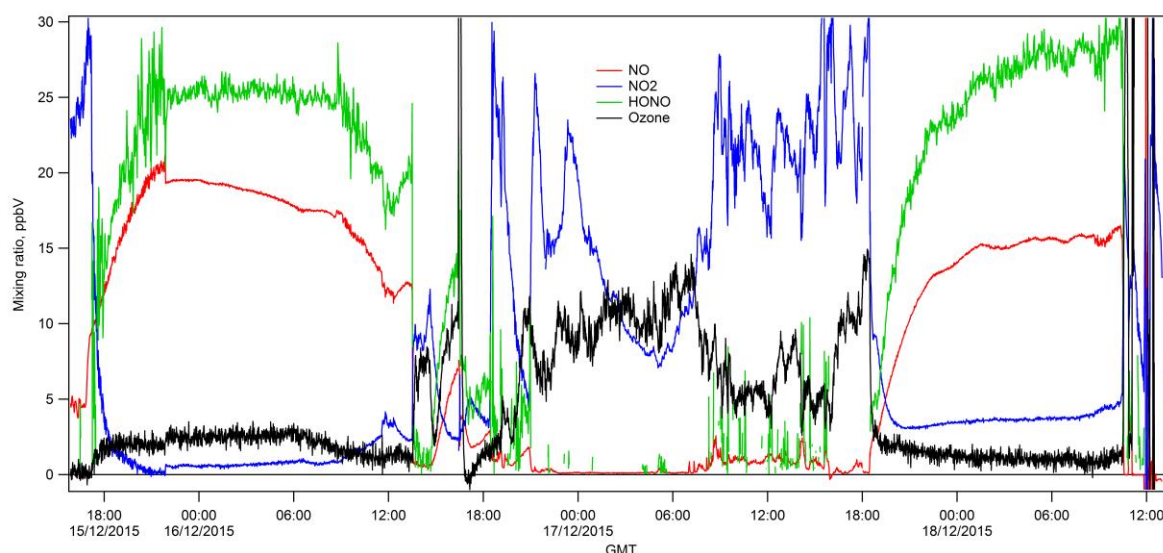

Figure 3. NO (red), NO<sub>2</sub> 395 nm (blue), HONO (green), and Ozone (black) measured indoor under ventilated (somewhat turbulent) and sealed (stable) conditions measured by the pHONO instrument and Thermo 49i.

## 2. pHONO data in turbulent conditions at Weybourne Atmospheric Observatory (WAO)

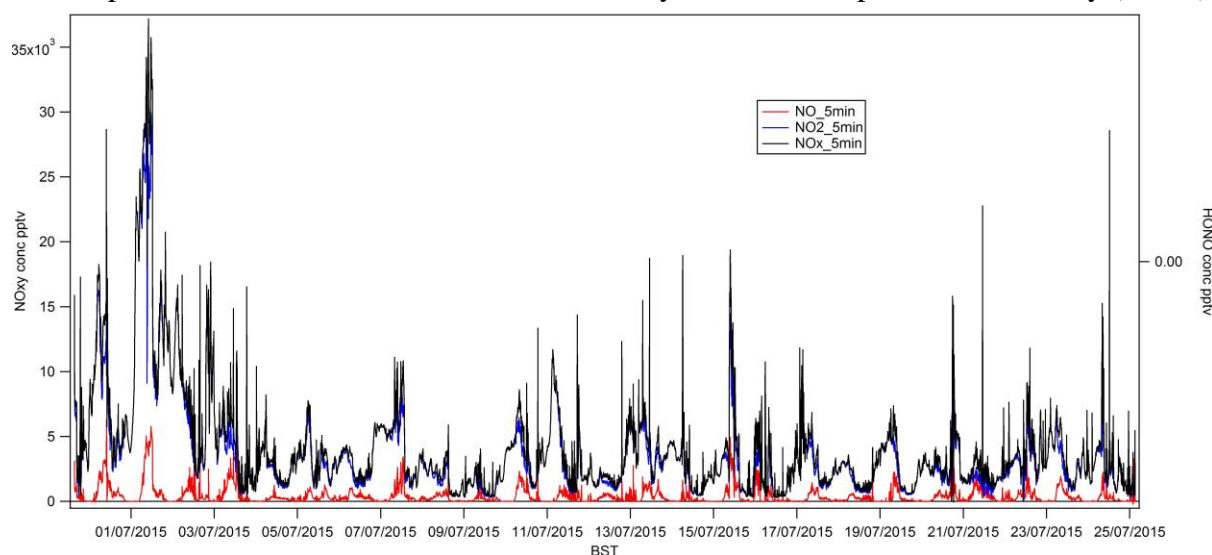

Figure 4. NO (red), NO<sub>2</sub> 395nm (blue), and NO<sub>x</sub> (black) data measured during July 2015 at WAO by the pHONO instrument.

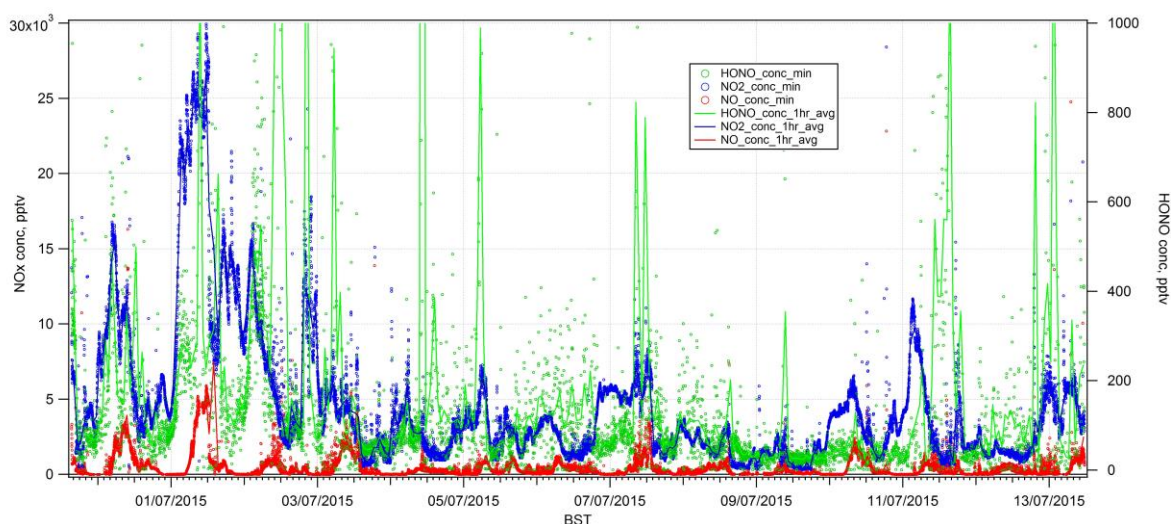

Figure 5. Minute and hourly averaged NO (red), NO<sub>2</sub> 395 nm (blue) and HONO (green) data measured at WAO in July 2015 by the pHONO instrument.

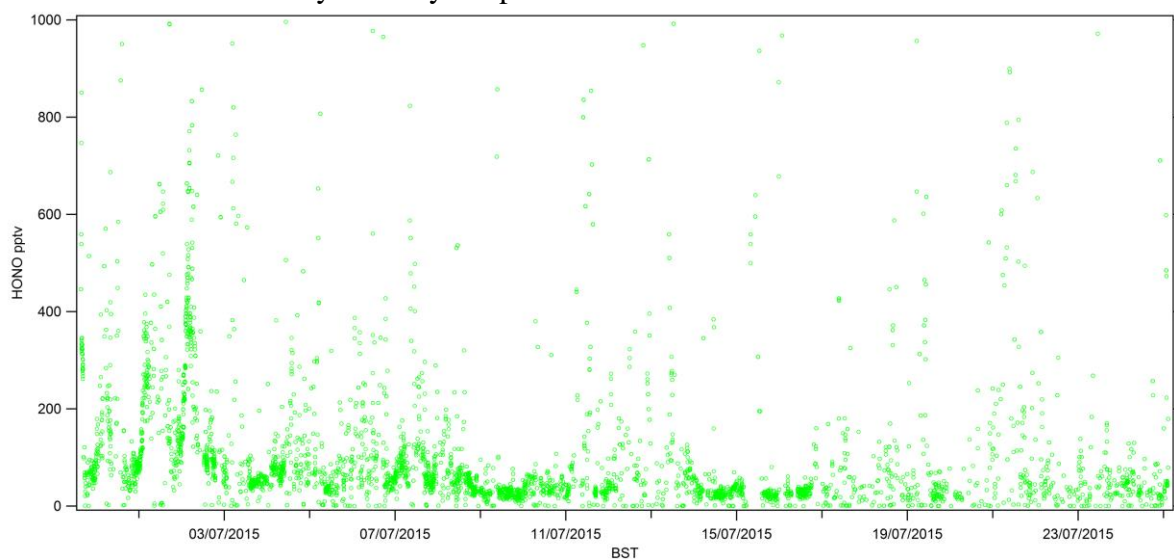

Figure 6. Unfiltered minute HONO data measured by pHONO instrument during July 2015 by the pHONO instrument.
