# Supplementary material for: HONO measurement by differential photolysis
Source: Copernicus journal article supplement (doi:10.5194/amt-9-2483-2016), 2016-06-07
Supplement: Supplementary file 1 [file amt-9-2483-2016-supplement.zip › HIRAC_timseries.csv]

Time_BST	NO_ppbV	NO2_ppbV	HONO_ppbV
10:25	118.341	196.5795107	0.196579511
13:52	118.73	235573.3945	235.5733945
13:53	114.991	228033.6391	228.0336391
13:54	113.894	221787.4618	221.7874618
13:55	112.496	222339.4495	222.3394495
13:56	111.697	218759.9388	218.7599388
13:57	113.968	236871.5596	236.8715596
13:58	109.096	222371.5596	222.3715596
13:59	107.648	226880.7339	226.8807339
14:00	106.675	227010.7034	227.0107034
14:07	105.639	169663.6086	169.6636086
14:08	71.0847	167636.0856	167.6360856
14:09	42.5234	172376.1468	172.3761468
14:10	61.0304	180957.1865	180.9571865
14:11	86.5947	173441.896	173.441896
14:12	108.372	191749.2355	191.7492355
14:13	112.531	183354.7401	183.3547401
14:14	109.56	175651.3761	175.6513761
14:15	107.387	185581.0398	185.5810398
14:22	105.856	166824.159	166.824159
14:23	104.141	160747.7064	160.7477064
14:24	106.137	157243.1193	157.2431193
14:25	102.519	153587.156	153.587156
14:26	102.742	144289.1437	144.2891437
14:27	100.618	160458.7156	160.4587156
14:28	98.3855	163174.3119	163.1743119
14:29	99.1935	165281.3456	165.2813456
14:30	89.7289	171498.4709	171.4984709
14:33	85.4193	128650.9174	128.6509174
14:34	99.1047	131016.8196	131.0168196
14:35	98.3385	132551.5291	132.5515291
14:36	100.202	124736.3914	124.7363914
14:37	96.3895	129978.5933	129.9785933
14:38	95.2281	139419.419	139.419419
14:39	94.4875	136790.8257	136.7908257
14:40	0	137889.7554	137.8897554
14:41	94.6173	131202.5994	131.2025994
14:42	91.432	149862.5382	149.8625382
14:43	0	140249.5413	140.2495413
14:44	88.8332	143825.6881	143.8256881
14:45	87.7165	145514.9847	145.5149847
14:49	66.7899	112416.8196	112.4168196
14:50	84.7527	114441.896	114.441896
14:51	93.4394	119414.3731	119.4143731
14:52	92.0029	126025.3823	126.0253823
14:53	91.1154	115487.0031	115.4870031
14:54	91.9442	124292.6606	124.2926606
14:55	89.6124	132381.4985	132.3814985
14:56	88.3322	123383.0275	123.3830275
14:57	87.4092	135803.3639	135.8033639
14:58	86.3745	131647.8593	131.6478593
15:36	88.6352	81345.10703	81.34510703
15:37	85.6105	91877.98165	91.87798165
15:38	84.4622	88168.04281	88.16804281
15:39	83.7216	92337.15596	92.33715596
15:40	83.0468	96858.25688	96.85825688
15:41	91.5906	90552.29358	90.55229358
15:42	87.0784	109701.0703	109.7010703
15:43	86.3863	108438.3792	108.4383792
15:44	85.1241	111478.4404	111.4784404
15:45	84.2623	104167.737	104.167737
15:46	86.6014	109806.1162	109.8061162
15:47	83.9023	100784.8624	100.7848624
15:51	82.6947	81271.10092	81.27110092
15:52	81.9001	83061.7737	83.0617737
15:53	81.4056	83932.263	83.932263
15:54	83.1192	85233.18043	85.23318043
15:55	80.4691	82998.77676	82.99877676
15:56	79.4758	88315.44343	88.31544343
15:57	78.4184	92622.17125	92.62217125
15:58	77.7954	93464.8318	93.4648318
15:59	80.1964	92925.84098	92.92584098
16:00	77.6717	94856.42202	94.85642202
16:06	75.9074	71589.60245	71.58960245
16:07	75.3116	72277.21713	72.27721713
16:08	75.4588	72252.9052	72.2529052
16:09	78.2832	74731.49847	74.73149847
16:10	74.8094	74649.23547	74.64923547
16:11	72.9771	75006.57492	75.00657492
16:12	72.6056	85306.42202	85.30642202
16:13	71.8547	75909.48012	75.90948012
16:14	74.4909	85680.12232	85.68012232
16:15	70.9161	78394.1896	78.3941896
16:20	69.6591	62849.84709	62.84984709
16:21	68.7545	54053.0581	54.0530581
16:22	68.0188	62621.25382	62.62125382
16:23	71.5403	57151.37615	57.15137615
16:24	67.8384	65474.92355	65.47492355
16:25	0	66120.79511	66.12079511
16:26	65.4581	59616.66667	59.61666667
16:27	64.1543	65212.23242	65.21223242
16:28	67.7199	69070.18349	69.07018349
16:29	0	64398.01223	64.39801223
16:30	63.2212	67483.79205	67.48379205
16:42	62.4166	25205.19878	25.20519878
16:43	61.8007	23037.00306	23.03700306
16:44	64.6402	21706.72783	21.70672783
16:45	61.3723	23239.75535	23.23975535
16:46	59.9962	20201.07034	20.20107034
16:47	59.0625	21200.45872	21.20045872
16:48	57.9067	23605.19878	23.60519878
16:49	61.5527	26270.18349	26.27018349
16:50	57.8262	25475.22936	25.47522936
16:51	47.5652	21311.7737	21.3117737
16:52	62.4691	21379.5107	21.3795107
