# Supplementary material for: HONO measurement by differential photolysis
Source: Copernicus journal article supplement (doi:10.5194/amt-9-2483-2016), 2016-06-07
Supplement: Supplementary file 1 [file amt-9-2483-2016-supplement.zip › WAO_timeseries.csv]

Time BST	HONO_385_pptv	HONO_395_pptv	NO_pptv	NO2_pptv
29/06/2015 15:23	4166.97	3476.64	3220.34	13680.7
29/06/2015 15:24	4512.14	3476.64	3070.15	12012.7
29/06/2015 15:25	2700.99	2410.26	3389.58	10599.5
29/06/2015 15:26	599.837	-858.828	2724.79	9190.57
29/06/2015 15:27	593.632	1145.29	2435.18	8709.89
29/06/2015 15:28	710.991	1012.61	2098.68	8806.3
29/06/2015 15:29	915.793	859.438	1913.2	8594.67
29/06/2015 15:30	791.6	419.23	1664.88	7554.23
29/06/2015 15:31	569.533	685.793	1328.03	7131.71
29/06/2015 15:32	649.964	787.516	1049.9	6888.44
29/06/2015 15:33	751.439	634.475	761.717	6279.49
29/06/2015 15:34	1066.55	1158.05	755.181	6026.24
29/06/2015 15:35	1186.86	1747.63	723.898	6961.32
29/06/2015 15:36	1046.25	499.258	734.628	6715.69
29/06/2015 15:37	732.088	625.984	736.719	6612.28
29/06/2015 15:38	550.708	672.004	722.922	7102.1
29/06/2015 15:39	913.901	1037.91	728.893	7510.52
29/06/2015 15:40	870.067	665.256	716.354	7520.2
29/06/2015 15:41	1108.74	1035.7	716.953	7093.27
29/06/2015 15:42	2011	2344.12	767.098	6343.8
29/06/2015 15:43	1809.08	1988.66	753.596	6264.07
29/06/2015 15:44	586.235	852.316	753.85	6450.59
29/06/2015 15:45	651.045	563.277	752.07	6379.2
29/06/2015 15:46	673.808	751.885	763.93	6449.28
29/06/2015 15:47	661.085	630.322	771.158	6465.77
29/06/2015 15:48	715.592	694.547	777.319	6336.37
29/06/2015 15:49	825.049	1004.64	799.531	6564.11
29/06/2015 15:50	735.408	595.926	811.77	6610.01
29/06/2015 15:51	638.2	573.141	800.243	6640.13
29/06/2015 15:52	636.628	649.76	830.058	6661.28
29/06/2015 15:53	709.841	679.77	817.941	6532.22
29/06/2015 15:54	810.583	958.791	836.461	6687.55
29/06/2015 15:55	756.119	652.938	827.003	6713.31
29/06/2015 15:56	670.939	624.895	825.72	6724.11
29/06/2015 15:57	628.478	596.822	817.128	6717.97
29/06/2015 15:58	724.682	651.482	801.128	6393.29
29/06/2015 15:59	994.271	1329.2	846.141	6753.76
29/06/2015 16:00	904.305	692.555	855.9	6787.44
29/06/2015 16:01	715.754	613.238	868.328	6799.59
29/06/2015 16:02	640.165	574.088	870.67	6754.33
29/06/2015 16:03	699.269	677.342	859.158	6575.64
29/06/2015 16:04	831.521	1026.28	891.293	6814.83
29/06/2015 16:05	769.212	616.013	918.579	6803.75
29/06/2015 16:06	684.893	636.614	958.784	6764.85
29/06/2015 16:07	655.826	663.168	994.338	6781.94
29/06/2015 16:08	706.964	634.351	980.435	6572.62
29/06/2015 16:09	848.611	1011.5	986.165	6701.73
29/06/2015 16:10	688.428	434.266	964.896	6422.55
29/06/2015 16:11	537.941	602.763	1004.71	6419.44
29/06/2015 16:12	595.035	652.532	1120.34	6407.1
29/06/2015 16:13	708.331	648.719	1130.2	6185.62
29/06/2015 16:14	888.906	1146.87	1174.72	6497.52
29/06/2015 16:15	824.19	429.324	1041.16	6155.91
29/06/2015 16:16	700.914	908.993	1062.09	6296.26
29/06/2015 16:17	627.222	508.952	1011.66	6314.5
29/06/2015 16:18	662.829	620.076	987.73	6128.32
29/06/2015 16:19	856.851	960.446	956.588	6173.58
29/06/2015 16:20	706.71	612.856	911.266	6162
29/06/2015 16:21	560.237	546.355	912.985	6241.41
29/06/2015 16:22	580.405	560.085	897.538	6263.86
29/06/2015 16:23	650.918	546.42	847.999	5933.3
29/06/2015 16:24	743.816	893.073	844.808	6023.66
29/06/2015 16:25	653.58	588.363	809.82	6109.72
29/06/2015 16:26	587.476	537.42	813.429	6117.64
29/06/2015 16:27	579.09	568.757	814.414	6114.95
29/06/2015 16:28	606.138	545.834	777.426	5946.29
29/06/2015 16:29	659.971	847.247	811.255	6140.74
29/06/2015 16:30	605.446	485.604	813.573	6176.36
29/06/2015 16:31	544.224	496.518	830.526	6155.09
29/06/2015 16:32	541.572	566.387	850.306	6191.79
29/06/2015 16:33	597.984	527.895	831.392	6007.97
29/06/2015 16:34	705.667	882.35	853.005	6216.94
29/06/2015 16:35	665.851	532.957	861.508	6204.15
29/06/2015 16:36	598.62	598.897	876.274	6267.21
29/06/2015 16:37	557.19	522.102	908.097	6278.5
29/06/2015 16:38	619.229	554.197	916.419	6059.34
29/06/2015 16:39	826.931	1046.09	954.389	6276.8
29/06/2015 16:40	-979.896	576.813	4471.08	8847.83
29/06/2015 16:41	-3544.29	-9940	1066.56	6147.35
29/06/2015 16:42	-2708.87	133.891	948.571	5789.66
29/06/2015 16:43	-2334.77	-3772.32	351.697	1453.39
29/06/2015 16:44	-2261.09	127.993	358.848	1376.46
29/06/2015 16:45	-666.203	131.159	270.467	1375.63
29/06/2015 16:46	-202.782	127.568	341.505	1448.59
29/06/2015 16:47	-37.98	-53.0103	270.773	1427.23
29/06/2015 16:48	85.0317	156.514	276.533	1339.16
29/06/2015 16:49	194.429	258.49	269.708	1401.12
29/06/2015 16:50	180.361	147.483	296.554	1371.25
29/06/2015 16:51	215.182	323.792	323.79	1560.98
29/06/2015 16:52	298.912	521.258	420.575	2119.16
29/06/2015 16:53	85.7053	-560.18	286.947	1532.39
29/06/2015 16:54	-29.4075	390.174	345.402	1610.63
29/06/2015 16:55	196.633	205.34	309.304	1553.07
29/06/2015 16:56	228.112	348.243	362.356	1651.36
29/06/2015 16:57	203.308	118.356	335.691	1657.57
29/06/2015 16:58	212.654	237.075	329.989	1694.23
29/06/2015 16:59	210.196	185.479	321.231	1693.14
29/06/2015 17:00	153.997	174.904	382.481	1738.13
29/06/2015 17:01	112.469	56.1084	360.467	1783.6
29/06/2015 17:02	58.176	44.5908	409.741	1786.93
29/06/2015 17:03	12.8292	-19.0981	446.719	1787.06
29/06/2015 17:04	91.1021	76.0254	393.06	1795.02
29/06/2015 17:05	150.663	215.997	359.008	1863.11
29/06/2015 17:06	189.471	290.987	448.487	2001.61
29/06/2015 17:07	146.737	19.2129	389.141	2042.06
29/06/2015 17:08	156.157	187.372	438.951	2051.21
29/06/2015 17:09	289.109	351.465	473.953	2193.04
29/06/2015 17:10	174.168	42.231	478.856	2206.97
29/06/2015 17:11	97.3123	23.3784	436.872	2179.14
29/06/2015 17:12	147.788	172.238	402.983	2141.42
29/06/2015 17:13	200.828	189.651	366.107	1992.02
29/06/2015 17:14	160.414	213.228	381.834	2023.57
29/06/2015 17:15	130.319	63.0107	371.712	1971.37
29/06/2015 17:16	170.169	209.066	384.02	1942.79
29/06/2015 17:17	188.991	169.536	363.227	1878.57
29/06/2015 17:18	120.218	36.3413	324.354	1685.58
29/06/2015 17:19	77.085	204.956	345.026	1690.2
29/06/2015 17:20	191.981	152.509	227.037	1608.07
29/06/2015 17:21	244.709	358.543	281.609	1558.98
29/06/2015 17:22	231.706	250.335	344.027	1561.85
29/06/2015 17:23	191.451	66.0811	275.414	1418.07
29/06/2015 17:24	213.843	364.898	297.426	1503.58
29/06/2015 17:25	170.366	102.268	326.598	1470.55
29/06/2015 17:26	42.3393	-76.2236	252.5	1410.96
29/06/2015 17:27	38.5138	100.319	263.913	1420.05
29/06/2015 17:28	48.823	38.4033	297.107	1368.55
29/06/2015 17:29	124.099	212.381	329.417	1422.95
29/06/2015 17:30	151.806	103.476	318.8	1373.85
29/06/2015 17:31	131.517	143.551	292.146	1395.04
29/06/2015 17:32	99.4065	107.617	336.071	1399.74
29/06/2015 17:33	74.6734	-9.71533	235.785	1349.53
29/06/2015 17:34	147.856	238.769	209.606	1423.5
29/06/2015 17:35	116.853	60.9175	103.732	1479.74
29/06/2015 17:36	-1821.04	99.917	1106.16	7148.63
29/06/2015 17:37	-2104.38	-5945.64	693.688	5615
29/06/2015 17:38	-1644.23	-2646.87	17.6831	497.75
29/06/2015 17:39	-1895.24	730.135	126.141	534.322
29/06/2015 17:40	-554.474	74.7847	198.385	530.769
29/06/2015 17:41	-141.462	34.3369	254.583	471.029
29/06/2015 17:42	-148.194	68.2336	452.548	780.689
29/06/2015 17:43	2454.83	4763.74	665.314	4141.55
29/06/2015 17:44	2312.83	-2427.66	354.423	333.313
29/06/2015 17:45	-285.139	387.628	354.69	372.302
29/06/2015 17:46	-48.8125	52.0884	353.913	371.787
29/06/2015 17:47	35.8771	86.6379	360.383	383.288
29/06/2015 17:48	80.9194	78.301	335.684	360.63
29/06/2015 17:49	103.804	149.987	359.481	403.347
29/06/2015 17:50	79.7434	38.2341	357.2	409.887
29/06/2015 17:51	48.123	40.2642	396.661	393.746
29/06/2015 17:52	587.779	1307.54	437.405	1407.35
29/06/2015 17:53	834.006	415.365	299.584	1304.74
29/06/2015 17:54	165.842	294.505	322.992	1408.58
29/06/2015 17:55	126.515	-23.8057	213.763	1350.09
29/06/2015 17:56	94.1468	139.215	200.103	1339.44
29/06/2015 17:57	62.7701	53.0186	222.971	1306.85
29/06/2015 17:58	114.74	138.309	210.285	1295.85
29/06/2015 17:59	125.494	151.518	272.474	1334.42
29/06/2015 18:00	83.0608	66.6895	304.806	1441.61
29/06/2015 18:01	129.355	121.545	246.234	1568.14
29/06/2015 18:02	226.99	458.006	323.749	2001.4
29/06/2015 18:03	61.3697	65.0581	438.027	2728.81
29/06/2015 18:04	-79.6184	-178.346	386.616	2980.9
29/06/2015 18:05	5.36564	19.6924	453.875	3061.21
29/06/2015 18:06	10.2423	174.449	585.841	3465.84
29/06/2015 18:07	79.9208	-184.953	518.82	3355.22
29/06/2015 18:08	111.497	-53.8994	449.643	2718.93
29/06/2015 18:09	175.866	284.559	416.801	2491.02
29/06/2015 18:10	215.695	191.905	403.377	2088.51
29/06/2015 18:11	17.4848	86.2705	417.823	2048.59
29/06/2015 18:12	-257.864	-641.05	320.942	1542.49
29/06/2015 18:13	41.9592	724.201	479.303	2175.84
29/06/2015 18:14	800.774	406.336	280.607	2059.02
29/06/2015 18:15	650.505	533.809	233.84	1617.54
29/06/2015 18:16	255.763	120.223	247.91	1269.02
29/06/2015 18:17	48.4539	85.2893	257.176	1252.03
29/06/2015 18:18	79.9546	14.8494	155.367	1122.75
29/06/2015 18:19	108.822	173.365	253.992	1025.48
29/06/2015 18:20	56.6784	-14.77	161.912	1007.43
29/06/2015 18:21	121.327	351.127	253.626	1267.26
29/06/2015 18:22	178.531	36.7415	227.048	1249.12
29/06/2015 18:23	144.09	102.855	186.16	1171.42
29/06/2015 18:24	131.074	225.444	241.327	1226
29/06/2015 18:25	153.266	130.797	259.255	1262.94
29/06/2015 18:26	103.184	19.356	219.034	1222.8
29/06/2015 18:27	91.6604	111.592	181.325	1235.86
29/06/2015 18:28	156.129	175.295	188.235	1164.58
29/06/2015 18:29	186.023	237.793	163.95	1237.32
29/06/2015 18:30	189.226	123.802	129.52	1163.37
29/06/2015 18:31	108.917	292.216	213.504	1502.48
29/06/2015 18:32	306.199	229.233	195.256	1503.63
29/06/2015 18:33	349.067	231.325	128.072	1183.31
29/06/2015 18:34	145.016	427.465	142.14	1312.85
29/06/2015 18:35	212.277	169.328	145.402	1275.23
29/06/2015 18:36	143.909	132.946	126.015	1316.08
29/06/2015 18:37	132.703	119.698	120.905	1324.61
29/06/2015 18:38	-1049.3	157.578	10788.5	8995.23
29/06/2015 18:39	4866.95	-3134.62	63.9668	17014.4
29/06/2015 18:40	9.56641	543.904	1.30965	15966.1
29/06/2015 18:41	15.2859	-320.678	-23.1746	579.859
29/06/2015 18:42	32.8442	7430.6	-7.23528	500.884
29/06/2015 18:43	50.0604	72.3262	-14.2103	509.89
29/06/2015 18:44	53.5189	49.6836	-8.60068	485.414
29/06/2015 18:45	64.5626	65.3687	-12.6327	494.3
29/06/2015 18:46	82.4238	50.1467	-30.723	462.737
29/06/2015 18:47	64.2006	123.293	-16.0907	500.258
29/06/2015 18:48	51.6916	28.1477	-14.6445	493.55
29/06/2015 18:49	45.1289	45.9741	-15.1906	489.719
29/06/2015 18:50	46.2804	41.0674	-4.95496	473.293
29/06/2015 18:51	68.1588	38.7871	-20.6925	464.401
29/06/2015 18:52	65.1711	85.8621	7.4586	462.853
29/06/2015 18:53	52.1727	57.7644	31.286	455.613
29/06/2015 18:54	34.8965	47.3423	52.0716	455.78
29/06/2015 18:55	-377.955	26.2998	71.8225	457.079
29/06/2015 18:56	-491.263	29.8118	401.828	1822.79
29/06/2015 18:57	-47.0596	-955.528	216.282	1857.41
29/06/2015 18:58	64.0814	206.98	144.322	1820.56
29/06/2015 18:59	78.304	146.043	136.83	1784.56
29/06/2015 19:00	152.304	86.5479	113.347	1767.54
29/06/2015 19:01	258.61	148.895	113.544	1610.05
29/06/2015 19:02	178.104	339.226	137.151	1664.86
29/06/2015 19:03	175.897	116.316	157.372	1676
29/06/2015 19:04	208.481	181.147	142.08	1743.19
29/06/2015 19:05	183.1	242.152	194.041	1786.02
29/06/2015 19:06	240.103	157.373	247.203	1803.2
29/06/2015 19:07	247.502	364.572	321.429	1990.62
29/06/2015 19:08	172.257	99.4146	263.99	1984.4
29/06/2015 19:09	105.055	203.867	299.02	2048.36
29/06/2015 19:10	99.025	-3.04053	204.289	2063.95
29/06/2015 19:11	128.299	291.949	264.428	2451.18
29/06/2015 19:12	117.243	106.128	266.584	2710.52
29/06/2015 19:13	93.1742	64.6514	258.041	2914.44
29/06/2015 19:14	48.957	20.7524	252.29	2972.71
29/06/2015 19:15	106.34	95.3096	259.486	3181.41
29/06/2015 19:16	170.272	215.909	318.602	3587.6
29/06/2015 19:17	224.626	679.679	449.213	4904.38
29/06/2015 19:18	-39.2709	-85.3838	514.465	5759.24
29/06/2015 19:19	-944.18	707.216	732.372	8504.39
29/06/2015 19:20	-50.5621	-2936.02	656.105	7878.08
29/06/2015 19:21	882.696	1044.83	740.716	8892.94
29/06/2015 19:22	385.026	322.51	804.442	9579.39
29/06/2015 19:23	-6.98633	-863.07	642.562	8254.21
29/06/2015 19:24	-577.769	-709.596	477.893	5753.62
29/06/2015 19:25	-187.169	183.993	514.642	5562.33
29/06/2015 19:26	100.397	-6.65527	508.9	5350.04
29/06/2015 19:27	165.341	394.464	546.935	5744.72
29/06/2015 19:28	168.988	-36.0537	530.768	5700.67
29/06/2015 19:29	199.403	54.5215	488.994	5409.95
29/06/2015 19:30	90.4173	134.72	425.678	4954.98
29/06/2015 19:31	-102.601	9.34375	347.921	4338.01
29/06/2015 19:32	18.8032	103.157	363.858	4160.85
29/06/2015 19:33	62.4624	101.062	336.331	4048.37
29/06/2015 19:34	109.525	149.408	364.652	4037.32
29/06/2015 19:35	259.249	206.968	342.368	4248.88
29/06/2015 19:36	396.868	78.4111	324.122	3793.02
29/06/2015 19:37	336.479	492.211	281.12	3734.2
29/06/2015 19:38	226.859	382.019	284.562	3792.06
29/06/2015 19:39	164.439	323.546	298.486	4201.26
29/06/2015 19:40	-70.1854	239.111	343.54	4826.94
29/06/2015 19:41	645.021	-358.253	350.932	5149.56
29/06/2015 19:42	1025.93	1031.33	342.18	5454.45
29/06/2015 19:43	362.412	1020.19	302.807	5284.29
29/06/2015 19:44	-8.7504	-103.979	256.665	4771.74
29/06/2015 19:45	-38.6577	54.4512	244.035	4811.25
29/06/2015 19:46	-3.20093	-488.669	167.853	3723.68
29/06/2015 19:47	62.8918	449.974	175.722	3687.45
29/06/2015 19:48	48.2349	48.2163	159.847	3536.82
29/06/2015 19:49	59.5065	92.5894	155.269	3499.68
29/06/2015 19:50	110.614	50.4756	159.259	3416.42
29/06/2015 19:51	232.587	96.5444	135.105	3234.25
29/06/2015 19:52	175.941	305.719	135.149	3243.8
29/06/2015 19:53	134.396	146.919	129.535	3249.92
29/06/2015 19:54	152.312	75.0112	120.901	3169.25
29/06/2015 19:55	160.061	200.604	115.474	3178.81
29/06/2015 19:56	187.291	142.336	109.418	3128.86
29/06/2015 19:57	156.815	247.077	108.661	3194.59
29/06/2015 19:58	101.605	112.534	102.786	3199.46
29/06/2015 19:59	85.4138	69.3496	104.723	3185.72
29/06/2015 20:00	110.747	92.7607	103.447	3211.51
29/06/2015 20:01	189.657	81.1909	97.5375	3132.75
29/06/2015 20:02	180.939	283.545	104.599	3255.23
29/06/2015 20:03	136.61	119.079	99.7633	3270.91
29/06/2015 20:04	86.6612	98.1001	98.6413	3245.57
29/06/2015 20:05	82.0612	83.9355	110.145	3259.34
29/06/2015 20:06	145.145	-0.552246	93.5476	3083.16
29/06/2015 20:07	143.552	247.124	95.3147	3134.13
29/06/2015 20:08	140.519	131.352	97.8071	3163.69
29/06/2015 20:09	150.347	126.301	100.093	3161.77
29/06/2015 20:10	167.339	142.452	95.1827	3137.19
29/06/2015 20:11	236.689	130.791	89.221	2986.14
29/06/2015 20:12	198.388	375.566	99.0016	3134.07
29/06/2015 20:13	119.399	180.881	116.909	3301.97
29/06/2015 20:14	94.5959	141.555	124.413	3623.52
29/06/2015 20:15	10844.2	-34.957	117.284	3681.97
29/06/2015 20:16	25525.9	20902.6	2995.57	13067.3
29/06/2015 20:17	12306.6	17962.8	1546.98	11827.6
29/06/2015 20:18	1669.6	3880.62	127.282	3869.89
29/06/2015 20:19	616.32	223.316	113.897	3812.58
29/06/2015 20:20	330.133	229.209	123.179	4061.04
29/06/2015 20:21	239.075	82.9854	119.307	4076.85
29/06/2015 20:22	234.115	319.561	119.701	4233.51
29/06/2015 20:23	145.488	173.142	115.293	4279.19
29/06/2015 20:24	80.3467	121.135	114.621	4364.43
29/06/2015 20:25	3.9691	-9.89062	118.115	4310.01
29/06/2015 20:26	2.67627	-114.938	110.92	4041.39
29/06/2015 20:27	110.455	123.522	105.29	4001.41
29/06/2015 20:28	128.72	141.941	114.354	3882.25
29/06/2015 20:29	11618.6	178.221	105.186	3875.82
29/06/2015 20:30	13669.4	21506.6	1358.65	13100.2
29/06/2015 20:31	-1923.01	7009.45	112.125	4260.01
29/06/2015 20:32	-145.6	2487.65	103.267	4257.27
29/06/2015 20:33	23.1956	665.154	99.4858	3996
29/06/2015 20:34	110.095	172.591	94.8719	3886.72
29/06/2015 20:35	160.894	184.424	97.2383	3845.36
29/06/2015 20:36	166.461	202.041	90.0728	3848.27
29/06/2015 20:37	131.955	147.594	82.9429	3812.91
29/06/2015 20:38	102.009	144.942	88.1938	3829.63
29/06/2015 20:39	85.9888	116.042	99.884	3907.82
29/06/2015 20:40	123.51	53.1211	90.8235	3948.95
29/06/2015 20:41	208.377	89.21	65.0783	3869.98
29/06/2015 20:42	166.57	283.657	74.3304	3958.33
29/06/2015 20:43	116.553	72.7764	74.8027	3892.9
29/06/2015 20:44	87.1068	130.327	77.9776	3917.18
29/06/2015 20:45	118.863	49.8203	79.3081	3890.04
29/06/2015 20:46	199.175	88.3682	89.9644	3723.07
29/06/2015 20:47	155.076	298.519	76.5491	3830.57
29/06/2015 20:48	134.151	100.655	76.7247	3856.2
29/06/2015 20:49	155.409	143.18	63.6391	3938.53
29/06/2015 20:50	177.774	137.367	66.9984	3937.13
29/06/2015 20:51	210.254	129.63	57.9272	3782.29
29/06/2015 20:52	149.339	324.81	76.379	3889.64
29/06/2015 20:53	111.658	38.9277	60.4031	3850.97
29/06/2015 20:54	122.99	99.4761	68.3631	3805.51
29/06/2015 20:55	142.221	163.76	64.3182	3856.29
29/06/2015 20:56	194.002	89.2812	61.9118	3739.39
29/06/2015 20:57	119.909	292.375	60.3952	3855.9
29/06/2015 20:58	77.9304	116.633	58.5387	4064.15
29/06/2015 20:59	146.912	20.8262	52.2766	4194.96
29/06/2015 21:00	168.833	144.354	56.0356	4230.15
29/06/2015 21:01	180.581	105.038	44.6669	4080.78
29/06/2015 21:02	162.995	308.45	54.3092	4195.42
29/06/2015 21:03	150.528	81.1475	44.161	4167.69
29/06/2015 21:04	161.08	137.578	50.7632	4109.47
29/06/2015 21:05	140.734	204.923	52.6192	4145.98
29/06/2015 21:06	148.108	57.502	36.3247	4003.83
29/06/2015 21:07	156.562	273.465	47.0124	4127.7
29/06/2015 21:08	154.507	125.507	53.2128	4194.66
29/06/2015 21:09	134.572	165.507	59.3753	4289.63
29/06/2015 21:10	139.112	110.911	67.8002	4348.7
29/06/2015 21:11	201.098	79.5566	53.3683	4271.2
29/06/2015 21:12	188.025	292.564	63.3764	4375.27
29/06/2015 21:13	135.667	139.138	50.8951	4417.3
29/06/2015 21:14	91.691	112.519	57.059	4449.48
29/06/2015 21:15	118.667	74.0996	50.8534	4504.25
29/06/2015 21:16	230.265	97.5986	42.2379	4477.56
29/06/2015 21:17	212.307	349.348	58.7422	4665.87
29/06/2015 21:18	177.91	95.2344	51.1236	4647.74
29/06/2015 21:19	167.649	194.539	56.6573	4695.66
29/06/2015 21:20	174.119	129.415	45.0552	4683.16
29/06/2015 21:21	226.568	125.089	46.9942	4510.87
29/06/2015 21:22	201.705	321.305	47.9926	4575.11
29/06/2015 21:23	152.869	149.836	49.2941	4548.28
29/06/2015 21:24	120.419	146.547	49.8205	4565.78
29/06/2015 21:25	167.901	63.4307	29.2872	4508.56
29/06/2015 21:26	277.221	159.065	28.8247	4329.48
29/06/2015 21:27	218.091	403.036	44.1252	4456.27
29/06/2015 21:28	144.39	129.334	43.7438	4473.31
29/06/2015 21:29	129.02	103.464	33.5866	4490.18
29/06/2015 21:30	143.067	133.445	37.6155	4520.43
29/06/2015 21:31	233.549	75.6006	32.965	4359.19
29/06/2015 21:32	201.173	383.662	45.6562	4488.98
29/06/2015 21:33	117.008	139.469	33.6339	4544.34
29/06/2015 21:34	115.415	22.0391	42.8741	4454.03
29/06/2015 21:35	131.297	143.08	39.9775	4443.86
29/06/2015 21:36	153.315	97.3662	48.4515	4304.26
29/06/2015 21:37	117.284	194.69	55.1817	4281.67
29/06/2015 21:38	119.514	108.132	40.2245	4290.79
29/06/2015 21:39	147.126	86.0566	46.3099	4200.57
29/06/2015 21:40	166.182	200.286	49.2328	4204.74
29/06/2015 21:41	209.792	129.678	44.2525	4092.21
29/06/2015 21:42	158.506	241.959	37.268	4099.59
29/06/2015 21:43	113.568	145.157	40.3145	4123.3
29/06/2015 21:44	106.394	72.2715	47.5539	4099.02
29/06/2015 21:45	81.4296	99.6621	45.5734	4076.68
29/06/2015 21:46	112.918	59.0137	53.8664	4009.11
29/06/2015 21:47	111.949	193.658	55.3281	4082.94
29/06/2015 21:48	127.433	104.385	52.8626	4153.33
29/06/2015 21:49	159.631	170.95	45.3999	4309.06
29/06/2015 21:50	79.2238	140.776	45.2129	4376.23
29/06/2015 21:51	21.2881	43.0693	41.5202	4467.52
29/06/2015 21:52	100.217	5.41895	41.7671	4469.66
29/06/2015 21:53	136.136	148.18	38.9747	4498.9
29/06/2015 21:54	207.283	202.653	36.8881	4644.37
29/06/2015 21:55	249.594	121.869	40.5912	4492.21
29/06/2015 21:56	175.738	208.109	29.6546	4159.15
29/06/2015 21:57	173.773	341.946	35.1316	4241.79
29/06/2015 21:58	121.642	81.707	38.7557	4116.02
29/06/2015 21:59	68.114	104.308	32.5853	4025.02
29/06/2015 22:00	102.535	74.5791	31.5307	4007.4
29/06/2015 22:01	200.36	65.6914	24.9197	3845.16
29/06/2015 22:02	184.002	281.042	34.6293	3878.89
29/06/2015 22:03	142.237	120.417	29.2256	3796.78
29/06/2015 22:04	122.895	130.303	38.5378	3718.98
29/06/2015 22:05	139.477	172.712	33.6879	3796.55
29/06/2015 22:06	218.404	21.9009	36.5718	3529.83
29/06/2015 22:07	194.028	388.781	33.9847	3661.85
29/06/2015 22:08	127.545	108.521	36.8743	3623.25
29/06/2015 22:09	121.563	105.275	29.8782	3620.57
29/06/2015 22:10	137.973	123.643	32.172	3621.55
29/06/2015 22:11	135.745	119.91	24.7323	3559.75
29/06/2015 22:12	97.4801	172.773	34.7785	3585.3
29/06/2015 22:13	83.7437	52.3135	32.1421	3561.5
29/06/2015 22:14	111.447	60.8462	34.2163	3496.68
29/06/2015 22:15	121.063	144.295	36.7931	3476.34
29/06/2015 22:16	129.247	76.1392	39.6496	3315.8
29/06/2015 22:17	120.73	214.587	40.2965	3370.8
29/06/2015 22:18	113.435	109.915	37.7142	3421.9
29/06/2015 22:19	130.204	86.3906	38.4567	3415.26
29/06/2015 22:20	131.84	116.583	41.4003	3354.82
29/06/2015 22:21	111.896	102.885	39.805	3205.02
29/06/2015 22:22	107.419	171.875	45.0293	3215.89
29/06/2015 22:23	112.232	98.0601	35.8466	3226.48
29/06/2015 22:24	79.8498	129.23	45.0282	3252.7
29/06/2015 22:25	93.4657	20.583	35.5355	3197.41
29/06/2015 22:26	159.709	86.6777	33.9676	3091.2
29/06/2015 22:27	117.527	196.633	43.0835	3107.65
29/06/2015 22:28	95.6239	79.7183	36.7381	3102.28
29/06/2015 22:29	91.1209	65.6689	44.0767	3037.84
29/06/2015 22:30	99.1832	109.745	27.3812	3047.08
29/06/2015 22:31	161.377	67.7358	28.5889	2940.65
29/06/2015 22:32	160.016	245.622	36.5975	3009.83
29/06/2015 22:33	171.041	128.962	27.0341	3032.87
29/06/2015 22:34	167.459	185.699	30.8633	3061.64
29/06/2015 22:35	149.211	177.493	36.4861	3119.31
29/06/2015 22:36	120.399	106.451	24.6053	3113.73
29/06/2015 22:37	73.7472	168.666	33.9386	3226.96
29/06/2015 22:38	54.8929	-32.1431	36.2646	3168.48
29/06/2015 22:39	48.6469	61.3755	29.4516	3156.59
29/06/2015 22:40	111.467	3.12549	23.8056	3043.67
29/06/2015 22:41	278.835	134.346	20.1515	2879.66
29/06/2015 22:42	240.434	338.023	40.0469	2839.06
29/06/2015 22:43	160.651	207.961	29.8626	2779.7
29/06/2015 22:44	124.467	164.365	29.2906	2813.59
29/06/2015 22:45	114.873	65.3945	24.5139	2753.38
29/06/2015 22:46	138.579	86.9976	21.3528	2617.25
29/06/2015 22:47	140.413	191.785	27.659	2609.75
29/06/2015 22:48	126.31	110.775	24.9372	2534.09
29/06/2015 22:49	141.332	99.0337	34.6948	2397.81
29/06/2015 22:50	146.365	165.31	35.5399	2309.42
29/06/2015 22:51	153.438	156.453	28.6921	2239.87
29/06/2015 22:52	161.565	207.167	28.8648	2273.95
29/06/2015 22:53	144.32	148.125	28.8784	2268.92
29/06/2015 22:54	124.613	124.566	29.993	2236.91
29/06/2015 22:55	109.26	126.189	26.6023	2235.65
29/06/2015 22:56	109.231	99.6172	32.3142	2218.15
29/06/2015 22:57	110.976	143.834	19.6872	2291.8
29/06/2015 22:58	103.016	108.074	26.0059	2348.32
29/06/2015 22:59	115.709	99.2002	30.4031	2407.73
29/06/2015 23:00	134.734	105.116	26.9957	2435.56
29/06/2015 23:01	151.067	117.21	26.1874	2389.51
29/06/2015 23:02	135.466	222.651	24.5558	2494.87
29/06/2015 23:03	78.0796	80.5312	26.0106	2498.43
29/06/2015 23:04	80.3239	52.5044	26.9344	2511.2
29/06/2015 23:05	147.934	64.1191	26.5631	2484.97
29/06/2015 23:06	212.487	145.919	13.8002	2369.19
29/06/2015 23:07	183.771	316.717	20.0144	2489.18
29/06/2015 23:08	140.612	111.3	21.5752	2492.06
29/06/2015 23:09	122.022	116.024	22.4859	2488.88
29/06/2015 23:10	113.981	93.7891	20.2917	2443.77
29/06/2015 23:11	174.195	109.246	19.4087	2387.39
29/06/2015 23:12	169.831	286.827	16.9539	2539.35
29/06/2015 23:13	98.6133	125.582	16.7115	2606.08
29/06/2015 23:14	65.3545	75.0718	22.219	2696.19
29/06/2015 23:15	102.924	-36.645	17.2182	2592.81
29/06/2015 23:16	191.493	163.762	14.3615	2582.29
29/06/2015 23:17	152.591	221.02	15.2852	2627.4
29/06/2015 23:18	95.1438	141.124	20.6339	2688.55
29/06/2015 23:19	75.2135	50.3843	20.5549	2717.16
29/06/2015 23:20	109.553	80.7422	15.5619	2788.42
29/06/2015 23:21	183.771	138.79	17.4077	2893.6
29/06/2015 23:22	153.796	152.994	22.2598	2905.55
29/06/2015 23:23	99.8171	190.025	23.3725	3045.24
29/06/2015 23:24	67.0678	42.7021	31.7077	3105.39
29/06/2015 23:25	91.5402	108.039	35.2971	3309.57
29/06/2015 23:26	182.059	69.8145	22.4907	3465.66
29/06/2015 23:27	144.593	130.042	35.6077	3432.13
29/06/2015 23:28	72.5358	349.321	27.0527	3966.04
29/06/2015 23:29	72.7681	11.4707	24.5307	4435.68
29/06/2015 23:30	133.525	33.3398	30.0764	4805.33
29/06/2015 23:31	238.437	28.7979	25.1686	4876.95
29/06/2015 23:32	194.706	460.977	26.606	5376.11
29/06/2015 23:33	131.671	29.5254	30.9549	5607.68
29/06/2015 23:34	105.372	42.4863	38.3631	5699.08
29/06/2015 23:35	137.229	192.569	44.6457	6024.97
29/06/2015 23:36	266.236	17.3271	39.2536	6047.04
29/06/2015 23:37	238.825	452.038	44.7081	6428.12
29/06/2015 23:38	180.015	52.9521	33.5963	6470.8
29/06/2015 23:39	135.54	166.074	35.1882	6537.6
29/06/2015 23:40	195.937	161.986	45.5634	6708.83
29/06/2015 23:41	407.854	195.114	36.7944	6850.92
29/06/2015 23:42	337.659	585.621	38.7741	7288.17
29/06/2015 23:43	225.293	79.2324	30.9511	7257.52
29/06/2015 23:44	162.079	204.557	44.646	7289.47
29/06/2015 23:45	191.751	117.431	40.6126	7310.22
29/06/2015 23:46	403.884	107.688	19.1023	7082.3
29/06/2015 23:47	328.233	674.082	36.2854	7402.59
29/06/2015 23:48	220.949	184.937	37.4827	7524.73
29/06/2015 23:49	184.346	157.598	41.0839	7625.77
29/06/2015 23:50	252.84	131.501	33.2063	7657.42
29/06/2015 23:51	410.045	164.541	33.3461	7337.56
29/06/2015 23:52	303.658	596.08	28.5283	7532.76
29/06/2015 23:53	213.749	197.39	36.1865	7611.53
29/06/2015 23:54	186.593	146.646	28.5359	7653.82
29/06/2015 23:55	202.972	162.707	21.8945	7670.44
29/06/2015 23:56	215.497	202.692	21.7893	7656.61
29/06/2015 23:57	187.784	289.011	28.4697	7817.25
29/06/2015 23:58	165.665	110.799	26.6892	7865.93
29/06/2015 23:59	109.992	171.078	33.6351	7943.95
30/06/2015 00:00	129.658	44.2314	21.9342	7948.78
30/06/2015 00:01	282.881	92.8164	26.1565	7802.58
30/06/2015 00:02	212.98	430.258	28.0317	7979.51
30/06/2015 00:03	144.062	162.501	36.0993	8135.44
30/06/2015 00:04	154.121	88.625	45.7747	8240.98
30/06/2015 00:05	143.369	78.3672	39.6905	8170.24
30/06/2015 00:06	152.986	115.734	37.554	8019.95
30/06/2015 00:07	146.29	354.371	34.4006	8325.83
30/06/2015 00:08	114.342	125.855	34.0597	8640.54
30/06/2015 00:09	128.861	-30.5195	22.24	8662.67
30/06/2015 00:10	231.96	230.398	35.7454	8878.74
30/06/2015 00:11	347.98	228.189	34.2094	9000.18
30/06/2015 00:12	290.245	365.721	26.7088	9146.57
30/06/2015 00:13	230.354	235.871	17.9375	9254.08
30/06/2015 00:14	262.145	194.367	31.5935	9324.79
30/06/2015 00:15	345.488	287.721	34.694	9428.58
30/06/2015 00:16	444.652	175.977	27.1334	8978.41
30/06/2015 00:17	310.898	770.695	35.6074	9302.58
30/06/2015 00:18	159.329	-20.291	35.2066	9020.9
30/06/2015 00:19	129.922	234.402	29.276	9103.77
30/06/2015 00:20	219.527	70.9258	38.3094	9068.2
30/06/2015 00:21	357.683	90.8418	26.1914	8577.42
30/06/2015 00:22	209.082	480.912	36.8151	8514.27
30/06/2015 00:23	155.813	213.225	32.633	8630.39
30/06/2015 00:24	205.523	-38.3945	41.4659	8337.5
30/06/2015 00:25	240.535	351.774	39.9994	8347.94
30/06/2015 00:26	333.04	102.41	28.9635	7938.05
30/06/2015 00:27	302.446	568.074	23.0313	8116.73
30/06/2015 00:28	220.948	216.22	31.4328	8133.73
30/06/2015 00:29	125.998	92.2451	18.7024	7959.01
30/06/2015 00:30	131.498	138.453	22.0555	7915.52
30/06/2015 00:31	239.392	-13.5488	26.0874	7448.31
30/06/2015 00:32	220.482	499.071	22.2568	7655.91
30/06/2015 00:33	156.177	103.697	14.8557	7642.93
30/06/2015 00:34	133.777	163.925	18.3012	7710.72
30/06/2015 00:35	161.03	31.9561	23.3138	7562.9
30/06/2015 00:36	248.508	167.198	12.5205	7389.58
30/06/2015 00:37	244.983	404.856	14.1395	7523.12
30/06/2015 00:38	181.845	257.273	13.0235	7713.58
30/06/2015 00:39	172.667	115.418	15.9344	7818.94
30/06/2015 00:40	226.039	53.9238	15.2117	7658.49
30/06/2015 00:41	304.243	208.416	16.4082	7349.45
30/06/2015 00:42	166.949	440.043	15.2412	7423.22
30/06/2015 00:43	55.6039	132.131	20.7562	7578.12
30/06/2015 00:44	89.3081	-99.5811	15.9615	7504.3
30/06/2015 00:45	181.943	135.663	16.7688	7493.49
30/06/2015 00:46	359.569	240.815	19.5963	7518.66
30/06/2015 00:47	328.434	255.827	24.2238	7301.42
30/06/2015 00:48	245.998	339.433	15.8495	7120.87
30/06/2015 00:49	233.217	203.429	11.5701	6934.47
30/06/2015 00:50	277.812	291.759	4.87887	6901.49
30/06/2015 00:51	293.282	58.9004	4.56145	6188.77
30/06/2015 00:52	220.357	724.972	7.1138	6581.7
30/06/2015 00:53	167.838	38.1475	13.4318	6684.33
30/06/2015 00:54	109.075	105.43	10.0351	6707.53
30/06/2015 00:55	128.397	85.4434	4.67638	6750.58
30/06/2015 00:56	378.093	-4.66113	0.710233	6410.45
30/06/2015 00:57	311.96	694.559	9.39703	6766.35
30/06/2015 00:58	198.387	135.641	7.68559	6832.91
30/06/2015 00:59	212.521	127.289	6.38191	6867.22
30/06/2015 01:00	260.39	224.468	5.02582	6910.93
30/06/2015 01:01	301.422	148.842	2.79646	6588.13
30/06/2015 01:02	231.99	495.709	2.62676	6760.61
30/06/2015 01:03	178.133	88.4561	3.62098	6687.31
30/06/2015 01:04	173.538	191.26	5.56235	6710.33
30/06/2015 01:05	154.381	144.893	-2.10559	6681.48
30/06/2015 01:06	207.109	84.6807	3.1917	6465.07
30/06/2015 01:07	188.288	338.054	1.56097	6546.64
30/06/2015 01:08	143.832	134.898	1.35713	6524.12
30/06/2015 01:09	140.16	84.2637	-0.0349245	6415.57
30/06/2015 01:10	163.115	243.451	-1.94552	6558.14
30/06/2015 01:11	237.805	65.2412	-0.830225	6414.46
30/06/2015 01:12	166.616	347.654	0.391897	6527.82
30/06/2015 01:13	91.9237	137.831	0.31945	6671.94
30/06/2015 01:14	136.074	-42.5332	-0.0622905	6590.52
30/06/2015 01:15	252.763	216.335	-0.0244978	6648.64
30/06/2015 01:16	332.799	224.461	-3.066	6483.22
30/06/2015 01:17	216.322	447.594	-1.9577	6656.46
30/06/2015 01:18	130.927	94.002	-0.698963	6703.86
30/06/2015 01:19	118.226	44.8418	-5.36889	6656.28
30/06/2015 01:20	205.537	133.274	-6.13373	6655.13
30/06/2015 01:21	171.447	309.35	30.0734	6789.27
30/06/2015 01:22	62.3521	-10.8525	5.64724	6682.96
30/06/2015 01:23	246.596	144.497	-5.45248	6877.06
30/06/2015 01:24	279.352	445.849	-3.26637	7300.41
30/06/2015 01:25	11.4957	147.65	-3.36608	7381.67
30/06/2015 01:26	134.594	-190.608	-8.37436	7288.12
30/06/2015 01:27	252.024	584.534	0.426012	7929.35
30/06/2015 01:28	175.061	15.8535	0.101669	7965.27
30/06/2015 01:29	260.832	335.903	-12.2901	8483.82
30/06/2015 01:30	326.83	173.479	-2.17976	8665.45
30/06/2015 01:31	245.021	175.321	-10.2748	8395.95
30/06/2015 01:32	243.895	647.739	-7.19509	9033.11
30/06/2015 01:33	259.391	-5.71484	-4.5333	9191.53
30/06/2015 01:34	337.301	116.977	-3.51719	8993.53
30/06/2015 01:35	469.878	470.244	-4.50712	9019.27
30/06/2015 01:36	518.551	401.146	-11.4522	8678.28
30/06/2015 01:37	309.76	659.809	-8.60827	8763.46
30/06/2015 01:38	193.16	241.336	23.6218	8895.42
30/06/2015 01:39	205.198	30.1953	-4.31519	8846.46
30/06/2015 01:40	240.719	80.8926	-8.6735	8455.56
30/06/2015 01:41	492.498	364.583	-8.66891	8287.91
30/06/2015 01:42	394.471	715.637	-5.2407	8560.43
30/06/2015 01:43	221.761	87.6201	-11.214	8233.71
30/06/2015 01:44	168.343	263.024	-1.67661	8194.89
30/06/2015 01:45	213.956	148.683	-1.33665	8180.46
30/06/2015 01:46	338.489	121.756	3.08203	7836.46
30/06/2015 01:47	252.538	590.666	16.8178	8112.53
30/06/2015 01:48	179.533	117.308	15.9626	8222.9
30/06/2015 01:49	264.818	54.3408	18.3689	8123.74
30/06/2015 01:50	396.973	421.106	-0.21579	8319.51
30/06/2015 01:51	528.36	330.458	-8.60466	8169.35
30/06/2015 01:52	476.148	608.075	-3.39004	8194.78
30/06/2015 01:53	283.2	507.371	2.01516	8360.99
30/06/2015 01:54	186.436	133.459	-5.38361	8419.94
30/06/2015 01:55	233.696	109.753	-7.18602	8407.47
30/06/2015 01:56	328.482	140.998	-1.93077	8064.58
30/06/2015 01:57	284.386	541.632	-1.08448	8236.83
30/06/2015 01:58	192.868	137.88	0.939048	8129.21
30/06/2015 01:59	-81.6483	122.787	-3.75805	7970.68
30/06/2015 02:00	-962.138	170.242	293.268	8415.45
30/06/2015 02:01	2124.17	-1061.12	487.116	9995.1
30/06/2015 02:02	2481.6	2108.21	165.559	9051.03
30/06/2015 02:03	321.835	3341.15	104.535	8762.01
30/06/2015 02:04	-4.38693	-767.308	0.0940769	8484.81
30/06/2015 02:05	171.472	15.6953	5.08376	8523.42
30/06/2015 02:06	371.72	144.644	1.78554	8265.58
30/06/2015 02:07	236.462	534.216	19.4564	8460.88
30/06/2015 02:08	138.27	52.5859	30.8449	8408.68
30/06/2015 02:09	111.394	198.13	17.0521	8643.6
30/06/2015 02:10	163.955	154.858	1.49001	9011.37
30/06/2015 02:11	405.502	-46.2168	6.18451	8760.66
30/06/2015 02:12	275.515	725.064	9.49967	9165.7
30/06/2015 02:13	140.845	74.5781	17.4781	9275.05
30/06/2015 02:14	172.548	-17.166	5.73886	9196.72
30/06/2015 02:15	238.861	215.811	-5.56481	9179.82
30/06/2015 02:16	367.016	252.324	4.05256	9075.64
30/06/2015 02:17	265.368	481.016	11.5711	9262.47
30/06/2015 02:18	178.085	133.346	13.1185	9282.52
30/06/2015 02:19	169.848	65.1074	-3.95501	9158
30/06/2015 02:20	238.138	312.289	-0.628945	9360.21
30/06/2015 02:21	434.084	74.9746	-4.81392	9059.51
30/06/2015 02:22	365.789	689.744	-4.58328	9329.93
30/06/2015 02:23	175.214	172.279	-2.45163	9241.12
30/06/2015 02:24	283.194	226.223	-1.46096	9493.69
30/06/2015 02:25	994.899	260.365	-7.49143	9585.22
30/06/2015 02:26	1317.48	1084.22	-2.19728	8972.82
30/06/2015 02:27	714.309	1568.62	-1.10122	9470.33
30/06/2015 02:28	409.481	110.424	60.8009	9247.95
30/06/2015 02:29	291.858	268.637	-4.53793	9178.45
30/06/2015 02:30	160.656	299.34	-6.60823	9199.85
30/06/2015 02:31	-883.151	157.535	193.415	9193.39
30/06/2015 02:32	-759.166	-23.291	955.642	10863.8
30/06/2015 02:33	-239.246	-1709.63	1346.53	11067.8
30/06/2015 02:34	621.416	-1637.21	-9.93247	9102.08
30/06/2015 02:35	703.031	2770.88	241.156	9539.44
30/06/2015 02:36	-1793.51	1061.59	978.814	10471.1
30/06/2015 02:37	302.913	-3286.49	601.428	9431.04
30/06/2015 02:38	1294.9	1841.57	287.948	9754.48
30/06/2015 02:39	652.446	1661.58	278.582	9609.17
30/06/2015 02:40	874.609	1091.83	646.404	10803.2
30/06/2015 02:41	-264.124	-339.076	123.912	9552.37
30/06/2015 02:42	-68.9814	317.861	16.6243	9489.64
30/06/2015 02:43	49.4144	3.49219	6.03155	9250.59
30/06/2015 02:44	99.3966	137.674	-4.04473	9074.71
30/06/2015 02:45	1149.76	175.527	2.78779	9003.41
30/06/2015 02:46	1451.64	1886.05	10.3827	9436.09
30/06/2015 02:47	448.683	749.531	77.4102	9263.85
30/06/2015 02:48	154.252	83.7695	129.682	9446.58
30/06/2015 02:49	-46.6743	-46.7852	120.149	9557.98
30/06/2015 02:50	16.4907	-452.576	1.65643	9044.83
30/06/2015 02:51	342.004	582.42	4.55908	9782.82
30/06/2015 02:52	312.917	212.535	12.0037	9981.29
30/06/2015 02:53	183.606	145.963	0.252469	9848.88
30/06/2015 02:54	84.3022	117.15	-2.97523	9703.75
30/06/2015 02:55	142.219	-34.207	-3.70163	9391.7
30/06/2015 02:56	312.034	243.07	-4.4618	9232.1
30/06/2015 02:57	363.558	521.002	6.15876	9572.09
30/06/2015 02:58	400.599	339.146	2.56346	9879.75
30/06/2015 02:59	301.095	344.705	-3.25645	10016.6
30/06/2015 03:00	296.961	165.33	-4.94926	9942.28
30/06/2015 03:01	535.85	239.266	-2.09527	9702.75
30/06/2015 03:02	478.079	755.311	-5.4626	9931.07
30/06/2015 03:03	356.435	344.717	-5.81637	9932.54
30/06/2015 03:04	344.93	349.311	-7.68711	10060.8
30/06/2015 03:05	393.404	266.695	-5.5395	10016.5
30/06/2015 03:06	475.971	395.578	-11.8394	9917.7
30/06/2015 03:07	364.322	678.008	-7.11748	10262.8
30/06/2015 03:08	222.865	189.102	-8.53707	10366.6
30/06/2015 03:09	200.543	106.086	-7.98344	10358.1
30/06/2015 03:10	339.38	190.396	-10.2064	10353
30/06/2015 03:11	462.465	249.666	-14.1051	9915.45
30/06/2015 03:12	370.007	685.131	-5.83796	10120.9
30/06/2015 03:13	237.647	239.934	-8.9642	10173
30/06/2015 03:14	193.787	163.016	-1.69571	10189.9
30/06/2015 03:15	350.492	214.406	-1.87661	10309
30/06/2015 03:16	545.829	360.703	-10.0086	10262.9
30/06/2015 03:17	475.402	722.201	-6.60732	10586.9
30/06/2015 03:18	417.42	386.584	-10.5662	10840.5
30/06/2015 03:19	424.666	251.852	-6.30457	10764.8
30/06/2015 03:20	414.533	452.811	0.888669	10743.5
30/06/2015 03:21	441.992	300.547	8.36589	10417.1
30/06/2015 03:22	446.889	574.812	-0.652431	10440.8
30/06/2015 03:23	411.381	435.336	5.3855	10413.2
30/06/2015 03:24	297.589	335.285	3.60765	10254.7
30/06/2015 03:25	453.234	334.42	19.9526	10294.5
30/06/2015 03:26	695.698	946.508	657.647	10911.4
30/06/2015 03:27	760.059	614.379	851.833	11586.9
30/06/2015 03:28	448.609	95.7637	518.3	11261.7
30/06/2015 03:29	-36.3847	1162.67	1176.58	11967.5
30/06/2015 03:30	127.111	-1806.12	38.9046	10867.5
30/06/2015 03:31	435.229	1067.82	11.866	10662.3
30/06/2015 03:32	402.447	644.791	16.3501	10913.8
30/06/2015 03:33	560.185	221.633	12.4793	10814
30/06/2015 03:34	447.048	652.949	82.071	10660.6
30/06/2015 03:35	299.048	740.344	268.155	11204.4
30/06/2015 03:36	568.239	558.861	1196.23	12073.4
30/06/2015 03:37	401.159	-194.572	712.573	12295.6
30/06/2015 03:38	313.259	219.898	438.618	12013.7
30/06/2015 03:39	183.251	617.91	539.374	12176.3
30/06/2015 03:40	71.1987	241.254	822.876	12458.7
30/06/2015 03:41	-207.975	-212.025	1013.84	12311.6
30/06/2015 03:42	75.7389	-490.057	785.661	12224.7
30/06/2015 03:43	336.268	180.051	478.1	12162.5
30/06/2015 03:44	623.263	485.492	278.974	12066.3
30/06/2015 03:45	670.918	1206.15	553.782	12500.1
30/06/2015 03:46	648.592	-9.80859	326.546	11652
30/06/2015 03:47	977.357	1286.17	105.55	11871
30/06/2015 03:48	535.299	1314.92	228.103	12117.1
30/06/2015 03:49	122.962	463.006	650.828	12410.5
30/06/2015 03:50	194.482	-524.768	505.105	12215.3
30/06/2015 03:51	871.441	301.055	519.404	11983.6
30/06/2015 03:52	1159.3	1050.85	469.274	12043.8
30/06/2015 03:53	958.307	1490.14	674.232	12321.8
30/06/2015 03:54	128.397	790.887	854.153	12444.9
30/06/2015 03:55	-133.279	-1422.22	24.8031	10825.4
30/06/2015 03:56	218.339	687.266	39.8942	10596.5
30/06/2015 03:57	193.502	382.529	18.8976	10886.8
30/06/2015 03:58	193.371	112.561	27.1008	11041.6
30/06/2015 03:59	191.801	41.7422	26.8566	10852.3
30/06/2015 04:00	334.815	393.012	159.857	11011.5
30/06/2015 04:01	-376.997	218.936	21.992	10978
30/06/2015 04:02	-489.527	803.02	1084.15	12801.1
30/06/2015 04:03	-247.221	-2754.67	165.852	11746.4
30/06/2015 04:04	-224.633	1058.69	511.461	12243.2
30/06/2015 04:05	581.924	171.289	1037.26	13454.5
30/06/2015 04:06	1188.04	-72.1562	724.56	12919.3
30/06/2015 04:07	678.862	1619.05	1076.84	13309.3
30/06/2015 04:08	322.558	-415.961	474.687	12730
30/06/2015 04:09	242.039	976.227	720.63	13281.9
30/06/2015 04:10	654.695	12.8477	735.679	13604
30/06/2015 04:11	443.024	802.072	1139.55	13434.2
30/06/2015 04:12	410.327	217.066	953.087	13744.1
30/06/2015 04:13	730.648	267.477	777.316	13845.5
30/06/2015 04:14	800.469	1121.24	851.944	14250.6
30/06/2015 04:15	1155.59	518.484	655.635	14171.5
30/06/2015 04:16	995.742	1374.3	731.605	13870.5
30/06/2015 04:17	710.699	967.842	341.756	14459
30/06/2015 04:18	744.836	488.648	436.092	14443.8
30/06/2015 04:19	682.157	630.088	179.777	14460.2
30/06/2015 04:20	555.228	971.217	499.173	14664.2
30/06/2015 04:21	346.124	261.268	483.829	14657.9
30/06/2015 04:22	118.039	787.602	825.76	15208.8
30/06/2015 04:23	143.677	-295.854	925.03	15406.7
30/06/2015 04:24	463.604	294.928	893.702	16081.8
30/06/2015 04:25	709.141	254.842	943.326	15799.3
30/06/2015 04:26	1448	679.684	696.003	15350.5
30/06/2015 04:27	1058.59	1744.36	407.024	15519.3
30/06/2015 04:28	584.528	1310.58	899.015	15909.5
30/06/2015 04:29	551.455	409.262	1099.22	16735.2
30/06/2015 04:30	376.428	-58.3438	904.079	16541.4
30/06/2015 04:31	684.921	240.34	523.892	16323.8
30/06/2015 04:32	509.446	1214.64	697.943	16604.6
30/06/2015 04:33	511.274	96.5586	536.326	16490.9
30/06/2015 04:34	865.353	717.971	755.206	16475.2
30/06/2015 04:35	1067.89	1015.35	907.403	16454.8
30/06/2015 04:36	1117.56	706.559	676.11	15576
30/06/2015 04:37	695.322	1483.52	532.922	15899.6
30/06/2015 04:38	253.311	562.479	746.351	16079.3
30/06/2015 04:39	174.55	90.7637	1086.87	16277.5
30/06/2015 04:40	418.192	-287.512	810.732	16109.3
30/06/2015 04:41	488.921	767.525	1181.31	15854.2
30/06/2015 04:42	-99.6201	553.832	1094.66	16254.2
30/06/2015 04:43	54.8291	-750.584	975.508	15772.8
30/06/2015 04:44	675.336	389.217	797.226	15919.4
30/06/2015 04:45	489.289	1071.05	1059.29	15843.2
30/06/2015 04:46	969.425	0.363281	917.414	15125.6
30/06/2015 04:47	1124.36	1693.66	841.881	15636.4
30/06/2015 04:48	535.199	1298.3	1243.31	15925.4
30/06/2015 04:49	122.333	-55.5781	1278.96	15862.4
30/06/2015 04:50	48.3539	-34.1113	1404.22	15824.8
30/06/2015 04:51	314.021	-318.246	1287.65	15131.1
30/06/2015 04:52	376.993	1042.08	1256.88	15894.1
30/06/2015 04:53	-13.4494	-6.32422	1428.7	15559.4
30/06/2015 04:54	-440.409	-105.182	1466.63	15586.8
30/06/2015 04:55	-314.908	-682.553	1312.68	15736.9
30/06/2015 04:56	-248.552	-260.695	1647.79	15353.4
30/06/2015 04:57	-453.519	-154.627	1521.63	15892.1
30/06/2015 04:58	-440.849	-953.873	1165.92	15783.7
30/06/2015 04:59	-33.1522	-392.652	960.466	15624
30/06/2015 05:00	612.465	333.359	1060.56	15567.9
30/06/2015 05:01	1096.14	981.361	1564.14	15253.6
30/06/2015 05:02	1103.99	1173.93	1387.94	15719.4
30/06/2015 05:03	1010.81	881.064	1321.6	15569.3
30/06/2015 05:04	561.804	1252.33	1522.92	15821.6
30/06/2015 05:05	593.646	89.4512	1527.87	15664.8
30/06/2015 05:06	637.434	503.82	1579.05	15178.6
30/06/2015 05:07	153.137	858.574	1504.97	15823.5
30/06/2015 05:08	-230.923	-290.059	1855.04	15654.3
30/06/2015 05:09	-325.82	-324.965	2171.26	15763.8
30/06/2015 05:10	338.503	-745.648	2013.56	15481.2
30/06/2015 05:11	-158.39	661.713	1858.33	15127.9
30/06/2015 05:12	-777.089	85.1191	1961.19	16024.6
30/06/2015 05:13	176.595	-2051.08	1476.93	15399.3
30/06/2015 05:14	1032.96	1971.31	2339.88	16516
30/06/2015 05:15	751.796	302.879	1958.15	16151.9
30/06/2015 05:16	-580.463	1244.22	2581.19	16378.3
30/06/2015 05:17	-290.758	-1714.04	1840.43	15792
30/06/2015 05:18	151.513	351.369	1605.14	15797.5
30/06/2015 05:19	136.371	689.363	1999.19	15906.3
30/06/2015 05:20	571.206	-162.727	2063.28	15632
30/06/2015 05:21	1286.15	558.492	1805.74	14994
30/06/2015 05:22	1016.65	2189.91	2190.26	15691.7
30/06/2015 05:23	697.059	246.318	1917.69	15627
30/06/2015 05:24	743.377	745.703	2185.04	15529.3
30/06/2015 05:25	775.826	650.553	2105.28	15503.4
30/06/2015 05:26	115.642	867.871	2460.86	15230.8
30/06/2015 05:27	-145.044	-136.551	2149.53	15529.2
30/06/2015 05:28	23.4626	-130.807	2271.14	15793
30/06/2015 05:29	-74.3699	-163.738	2143.99	15664.4
30/06/2015 05:30	381.13	-350.684	1899.23	15091.5
30/06/2015 05:31	1096.35	1079.44	2364.43	14939.8
30/06/2015 05:32	517.813	590.309	1818.92	14969.5
30/06/2015 05:33	71.4403	616.188	2015.5	15086.3
30/06/2015 05:34	336.16	-204.863	2212.27	15079.5
30/06/2015 05:35	753.333	664.42	2595.72	15374.9
30/06/2015 05:36	662.603	495.258	2539.77	14929.5
30/06/2015 05:37	323.05	797.943	2392.17	15096.1
30/06/2015 05:38	-200.253	-242.42	1949.04	14577.5
30/06/2015 05:39	-510.532	219.564	2449.95	14737.7
30/06/2015 05:40	158.317	-1164.06	2147.66	14541.9
30/06/2015 05:41	752.25	1031	2798.6	14847.8
30/06/2015 05:42	-111.292	199.699	2485.15	15181.5
30/06/2015 05:43	-285.414	-629.012	2382.28	15078.2
30/06/2015 05:44	453.993	-590.344	2179.97	14533.8
30/06/2015 05:45	793.844	1184.91	2352.51	14446.3
30/06/2015 05:46	697.14	808.406	2394	14081.7
30/06/2015 05:47	639.471	967.027	2249.77	14458.7
30/06/2015 05:48	439.857	409.326	2219.79	14238.4
30/06/2015 05:49	314.137	484.953	2143.75	14412
30/06/2015 05:50	373.582	106.098	2165.13	14147.4
30/06/2015 05:51	397.713	140.83	1980.61	13311.3
30/06/2015 05:52	155.986	1015.85	2124.88	13838
30/06/2015 05:53	21.0254	-598.883	1884.62	13312.2
30/06/2015 05:54	35.2539	351.986	2014.5	13364
30/06/2015 05:55	-2.9974	-351.172	1818.22	12806.7
30/06/2015 05:56	417.445	202.9	1880.97	12490.1
30/06/2015 05:57	420.287	650.951	1792.05	12557.8
30/06/2015 05:58	224.552	462.297	1813.91	12541.2
30/06/2015 05:59	319.357	8.30664	1810.98	12278.8
30/06/2015 06:00	244.876	471.459	1866.75	12205.2
30/06/2015 06:01	284.926	-45.7812	1776.68	11581.9
30/06/2015 06:02	501.171	815.705	1778.33	12016.8
30/06/2015 06:03	450.483	251.346	1731.82	11703.6
30/06/2015 06:04	324.543	421.963	1662.24	11406.2
30/06/2015 06:05	306.964	355.854	1645.63	11283
30/06/2015 06:06	322.856	158.193	1652.57	10720.2
30/06/2015 06:07	348.514	754.996	1754.72	11064.2
30/06/2015 06:08	205.48	431.91	1901.13	11614.6
30/06/2015 06:09	-53.8114	171.404	2114.39	12193.6
30/06/2015 06:10	53.1814	-635.938	2071.74	11976.2
30/06/2015 06:11	362.026	7.85547	1996.11	11496
30/06/2015 06:12	296.66	811.24	2142.4	11999.8
30/06/2015 06:13	298.247	-95.4414	2134.27	11898.4
30/06/2015 06:14	146.469	130.379	2014.68	11511.4
30/06/2015 06:15	186.978	434.174	2128.22	11758.7
30/06/2015 06:16	366.604	182.287	2395.98	11845
30/06/2015 06:17	271.575	331.062	2382.94	12127.1
30/06/2015 06:18	130.867	1.65234	2324.35	11961.8
30/06/2015 06:19	172.63	153.236	2326.52	11966.1
30/06/2015 06:20	516.164	81.3945	2232.43	11788.8
30/06/2015 06:21	390.418	560.246	2154.68	11202
30/06/2015 06:22	57.7539	685.268	2265.84	11501.7
30/06/2015 06:23	62.3132	-461.859	2160.58	11231.9
30/06/2015 06:24	174.591	153.109	2128.39	11103.6
30/06/2015 06:25	270.453	332.832	2171.43	11145.3
30/06/2015 06:26	471.971	382.311	2346.39	11239.2
30/06/2015 06:27	498.229	540.123	2406.35	11482.4
30/06/2015 06:28	665.741	174.016	2177.69	11247.9
30/06/2015 06:29	499.096	755.18	2081.18	10904.2
30/06/2015 06:30	-216.427	1403.67	2795.79	12095.4
30/06/2015 06:31	-205.117	-2238.13	2080.08	10421.2
30/06/2015 06:32	64.6823	792.439	2019.6	10359.5
30/06/2015 06:33	-47.1925	-5.13086	1788.46	9891.7
30/06/2015 06:34	29.9788	293.6	1887.49	10035.5
30/06/2015 06:35	22.8373	-364.195	1654.24	9491.42
30/06/2015 06:36	190.93	250.855	1701.74	9163.86
30/06/2015 06:37	310.887	526.014	1739.92	9425.61
30/06/2015 06:38	259.085	247.115	1770.07	9435.95
30/06/2015 06:39	185.481	101.982	1731.61	9209.79
30/06/2015 06:40	120.607	279.844	1728.79	9255.06
30/06/2015 06:41	27.2441	103.236	1765.98	9309.28
30/06/2015 06:42	74.8177	-339.152	1545.48	8871.26
30/06/2015 06:43	206.753	457.967	1562.55	8963.69
30/06/2015 06:44	220.262	256.396	1578.11	9018.12
30/06/2015 06:45	54.0594	66.7656	1534.18	8759.35
30/06/2015 06:46	24.1963	66.873	1599.86	8596.89
30/06/2015 06:47	156.519	120.08	1564.52	8623.8
30/06/2015 06:48	221.015	180.371	1555.88	8510.85
30/06/2015 06:49	158.118	264.641	1541.86	8429.28
30/06/2015 06:50	169.334	256.207	1637.31	8552.72
30/06/2015 06:51	359.712	-161.299	1516.93	8014.55
30/06/2015 06:52	173.775	684.73	1540.31	8229.55
30/06/2015 06:53	-58.3243	38.6074	1596.74	8331.4
30/06/2015 06:54	123.932	-441.254	1486.78	7967.21
30/06/2015 06:55	318.237	314.855	1400.09	7798.62
30/06/2015 06:56	270.463	296.711	1303.75	7280.41
30/06/2015 06:57	311.199	703.712	1377.7	7607.74
30/06/2015 06:58	270.597	331.283	1492.15	7972.78
30/06/2015 06:59	179.918	84.1758	1533.36	8017.16
30/06/2015 07:00	71.901	132.623	1541.99	8090.36
30/06/2015 07:01	41.3486	-118.752	1496.84	7854.73
30/06/2015 07:02	122.286	379.898	1586.11	8205.69
30/06/2015 07:03	82.363	18.4512	1642.64	8330.01
30/06/2015 07:04	-26.9428	-67.6504	1613.06	8227.18
30/06/2015 07:05	167.615	-212.955	1485.88	7903.47
30/06/2015 07:06	470.404	326.803	1430.15	7594.27
30/06/2015 07:07	391.6	517.016	1357.2	7587.22
30/06/2015 07:08	322.1	534.73	1471.72	7834.24
30/06/2015 07:09	101.417	123.924	1478.45	7808.97
30/06/2015 07:10	284.156	-67.1094	1437.03	7686.04
30/06/2015 07:11	813.376	277.074	1328.83	7359.1
30/06/2015 07:12	643.457	1281.29	1529.61	7918.67
30/06/2015 07:13	430.874	150.75	1490.41	7852.1
30/06/2015 07:14	401.563	362.082	1477.14	7853.5
30/06/2015 07:15	321.29	379.105	1473.16	7827.48
30/06/2015 07:16	187.291	385.99	1622.43	7918.14
30/06/2015 07:17	221.572	222.141	1585.35	8080.7
30/06/2015 07:18	78.0733	185.414	1598.42	8078.64
30/06/2015 07:19	74.7875	100.023	1656.33	8256.62
30/06/2015 07:20	279.642	-51.3418	1595.94	8252.51
30/06/2015 07:21	454.311	393.504	1678.44	8125.67
30/06/2015 07:22	397.257	625.947	1676	8501.65
30/06/2015 07:23	287.642	322.055	1766.92	8752.12
30/06/2015 07:24	151.969	270.539	1872.81	9076.76
30/06/2015 07:25	292.691	-41.8906	1918.28	9164.01
30/06/2015 07:26	641.241	192.223	1930.66	8820.74
30/06/2015 07:27	472.951	1150.57	2075.51	9486.22
30/06/2015 07:28	193.386	249.812	2232.71	9932.12
30/06/2015 07:29	126.607	-131.096	2269.43	10060.6
30/06/2015 07:30	178.508	75.209	2375.54	10069
30/06/2015 07:31	271.796	202.021	2463.39	10109.4
30/06/2015 07:32	292.901	352.061	2529.69	10246
30/06/2015 07:33	226.326	226.988	2557.94	10267.1
30/06/2015 07:34	113.65	205.609	2619.18	10282.8
30/06/2015 07:35	116.708	118.252	2664.2	10459.2
30/06/2015 07:36	388.611	-67.5879	2643.12	10215.3
30/06/2015 07:37	403.686	671.396	2688.96	10484.9
30/06/2015 07:38	325.632	252.539	2639.88	10508.6
30/06/2015 07:39	243.081	301.668	2744.8	10413.2
30/06/2015 07:40	197.452	261.777	2762.5	10544.4
30/06/2015 07:41	358.664	33.625	2732.77	10357.6
30/06/2015 07:42	366.987	577.824	2760.97	10542.6
30/06/2015 07:43	248.708	335.385	2814.62	10647.3
30/06/2015 07:44	103.313	277.047	2965.53	10863.7
30/06/2015 07:45	797.547	-44.4863	3224.42	10797.3
30/06/2015 07:46	1339.43	806.088	2901.9	10467.6
30/06/2015 07:47	614.686	1394.07	2939.12	10674.9
30/06/2015 07:48	300.88	14.6211	2778.52	10534
30/06/2015 07:49	180.635	300.742	2841.76	10547.3
30/06/2015 07:50	188.116	168.219	2962.59	10614.7
30/06/2015 07:51	408.883	-97.9746	2868.11	10141
30/06/2015 07:52	372.907	960.018	2989.57	10651.7
30/06/2015 07:53	296.897	-6.49805	2855.1	10630.9
30/06/2015 07:54	246.147	394.439	3004.32	10655.1
30/06/2015 07:55	256.643	242.307	3062.83	10825
30/06/2015 07:56	529.448	6.37305	3092.08	10345
30/06/2015 07:57	394.105	847.859	3094.77	10636.5
30/06/2015 07:58	292.819	183.896	3021.51	10680.4
30/06/2015 07:59	212.837	298.928	3095.81	10718.2
30/06/2015 08:00	130.463	255.135	3208.43	10907.5
30/06/2015 08:01	266.288	-230.143	3050.3	10521.9
30/06/2015 08:02	269.278	671.547	3162.73	10842.4
30/06/2015 08:03	-37.9834	128.127	3169.92	11004.9
30/06/2015 08:04	-80.8304	-145.941	3264.25	11170.2
30/06/2015 08:05	298.012	-192.143	3269.4	11233.7
30/06/2015 08:06	790.749	296.793	3212.3	10847
30/06/2015 08:07	615.627	781.426	2884.55	10687
30/06/2015 08:08	7.70302	896.213	3045.08	10830.2
30/06/2015 08:09	-209.057	-251.119	3250.91	11047.2
30/06/2015 08:10	77.2878	-434.445	3334.44	11114.4
30/06/2015 08:11	315.926	-153.551	3073.18	10527
30/06/2015 08:12	212.46	645.473	3112.12	10653
30/06/2015 08:13	125.917	141.385	3145.45	10766.9
30/06/2015 08:14	62.1214	127.146	3223.08	10945
30/06/2015 08:15	188.315	-309.697	2975.54	10643
30/06/2015 08:16	443.131	417.713	3090.08	10338.1
30/06/2015 08:17	329.044	689.391	3100.46	10701.3
30/06/2015 08:18	180.508	102.998	3079.03	10736.2
30/06/2015 08:19	75.8516	166.623	3157.03	10814.1
30/06/2015 08:20	128.497	-46.5586	3152.85	10811.8
30/06/2015 08:21	293.577	-81.5117	3032.31	10262
30/06/2015 08:22	251.36	884.141	3149.53	10923
30/06/2015 08:23	225.973	-213.93	3105.71	10815.2
30/06/2015 08:24	193.089	150.129	3032.59	10581
30/06/2015 08:25	64.2348	303.215	2977.38	10633.6
30/06/2015 08:26	-180.729	-46.2871	3030.28	10458.5
30/06/2015 08:27	87.2207	46.0469	3171.57	10698.9
30/06/2015 08:28	421.469	40.8613	3105.74	10834.6
30/06/2015 08:29	249.382	581.459	3144.25	10847.4
30/06/2015 08:30	167.445	78.1543	3066.96	10756.4
30/06/2015 08:31	451.392	46.9902	3044.73	10348.2
30/06/2015 08:32	555.258	805.168	3110.16	10709.6
30/06/2015 08:33	331.849	287.473	2978.89	10572.9
30/06/2015 08:34	-58.0392	289.494	2967.01	10478.1
30/06/2015 08:35	39.8984	-221.58	2950.9	10465.4
30/06/2015 08:36	320.616	11.3223	2928.51	10251.6
30/06/2015 08:37	292.564	485.178	2967.63	10399.4
30/06/2015 08:38	241.575	153.785	2919.65	10361.6
30/06/2015 08:39	122.67	301.326	2942.3	10456.4
30/06/2015 08:40	-186.995	286.344	3225.45	10809.6
30/06/2015 08:41	469.293	-1081.54	2807.76	9911.02
30/06/2015 08:42	1258.07	1390.78	2842.39	10205.6
30/06/2015 08:43	270.79	2327.47	3421.18	11725.5
30/06/2015 08:44	-415.142	-1479.31	3256.74	11059.5
30/06/2015 08:45	-240.402	-479.242	3182.55	10906
30/06/2015 08:46	-26.1553	45.8223	3132.6	11230.6
30/06/2015 08:47	485.034	72.5527	3123.63	11097.7
30/06/2015 08:48	542.644	600.121	2985.81	10697.1
30/06/2015 08:49	-222.317	1100.21	3135.88	11271.9
30/06/2015 08:50	-530.556	-279.965	3528.01	12408.4
30/06/2015 08:51	367.635	-2618.5	2502.89	9819.18
30/06/2015 08:52	245.401	1842.85	2688.57	10107.2
30/06/2015 08:53	852.422	150.291	2843.81	10421.5
30/06/2015 08:54	1131.1	964.117	2781.18	10544.3
30/06/2015 08:55	686.854	1344.54	2875.36	10649.1
30/06/2015 08:56	553.364	767.012	3335.15	11246.5
30/06/2015 08:57	281.46	19.4238	3106.11	11195.2
30/06/2015 08:58	19.8532	178.41	2979.02	11025.3
30/06/2015 08:59	8.08453	5.53125	2933.29	11051.8
30/06/2015 09:00	123.726	80.0859	3004.08	11148.3
30/06/2015 09:01	525.05	-11.7148	2923.85	10890.2
30/06/2015 09:02	419.473	693.842	2872.4	10916.9
30/06/2015 09:03	272.99	501.576	2973.1	11089
30/06/2015 09:04	451.7	183.096	3010.32	11285.8
30/06/2015 09:05	833.7	341.168	2889.67	11172.8
30/06/2015 09:06	1288.95	1146.7	3080.67	11056.4
30/06/2015 09:07	1082.29	1571.1	3101.25	11722.9
30/06/2015 09:08	285.503	474.721	2878.49	11512.4
30/06/2015 09:09	-175.319	-90.8301	2722.69	11322.1
30/06/2015 09:10	30.18	-407.73	2557.39	11113.3
30/06/2015 09:11	404.252	301.176	2618.39	11175.8
30/06/2015 09:12	442.779	843.713	2791.01	11709.5
30/06/2015 09:13	350.214	-35.9141	2685.62	11450.3
30/06/2015 09:14	257.905	789.094	3008.26	11902.3
30/06/2015 09:15	360.369	22.1992	3100.39	12146.9
30/06/2015 09:16	388.386	58.25	2940.56	11702.2
30/06/2015 09:17	294.067	838.248	3059.07	12110.1
30/06/2015 09:18	145.671	387.768	3309.27	12841.5
30/06/2015 09:19	-82.6696	-1122.45	2692.12	11663.6
30/06/2015 09:20	35.3087	819.504	2894.67	12064.9
30/06/2015 09:21	297.538	-191.072	2982.81	11911.9
30/06/2015 09:22	78.0146	402.154	2958.58	12236
30/06/2015 09:23	119.986	-116.293	3019.8	12317
30/06/2015 09:24	157.2	165.352	3047.94	12477.5
30/06/2015 09:25	-989.943	144.846	3053.44	12588.7
30/06/2015 09:26	10386	-95.0098	16329.6	21096
30/06/2015 09:27	6944.4	-2263.73	13631.7	10135.6
30/06/2015 09:28	1607.89	12196	13760.8	10010.2
30/06/2015 09:29	-869.806	-5505.62	2637.98	10575.2
30/06/2015 09:30	-2119.44	709.062	2511.25	6747.29
30/06/2015 09:31	926.836	426.02	13704.8	10976.7
30/06/2015 09:32	40.3086	-5516.35	26.7668	20925.7
30/06/2015 09:33	30.9488	909.637	187.837	20964
30/06/2015 09:34	-2837.55	-420.66	-7.74963	584.073
30/06/2015 09:35	-3803.13	10035.8	-3.73662	474.797
30/06/2015 09:36	-896.645	40.3599	2631.64	10349.7
30/06/2015 09:37	-121.241	-6535.84	2537.86	10460.7
30/06/2015 09:38	310.52	379.453	2383.91	10149.7
30/06/2015 09:39	-95.0441	219.688	2203.15	9749.4
30/06/2015 09:40	621.898	872.988	2289.18	9905.59
30/06/2015 09:41	-1.41016	334.033	12057.6	7664.36
30/06/2015 09:42	430.211	-2640.84	470.8	16484
30/06/2015 09:43	335.975	538.039	379.342	16926.2
30/06/2015 09:44	163.916	-110.684	2124.08	9190.23
30/06/2015 09:45	159.576	3121.97	2151.9	9644.26
30/06/2015 09:46	453.316	51.5234	2168.99	9606.47
30/06/2015 09:47	743.018	-43.5645	2144.58	9314.79
30/06/2015 09:48	430.356	362.352	2218.83	9408.6
30/06/2015 09:49	201.776	428.459	2216.89	9110.44
30/06/2015 09:50	135.275	979.061	2249.83	9420.02
30/06/2015 09:51	141.372	73.8555	2240.35	9309.4
30/06/2015 09:52	481.709	-20.9648	2130.84	9047.52
30/06/2015 09:53	431.271	164.037	2075.35	8869.75
30/06/2015 09:54	246.204	-60.8066	1964.84	8138.96
30/06/2015 09:55	156.869	808.678	1874.25	8198.67
30/06/2015 09:56	124.093	308.342	1803.38	7966.01
30/06/2015 09:57	252.752	313.807	1821.85	8016.43
30/06/2015 09:58	202.441	-19.084	1759.58	7835.29
30/06/2015 09:59	-42.1115	-30.832	1693.75	7233.01
30/06/2015 10:00	-383.965	523.168	1682.27	7261.79
30/06/2015 10:01	-338.171	114.168	1633.81	7168.24
30/06/2015 10:02	268.051	566.098	1957.48	8437.11
30/06/2015 10:03	307.351	-1818.18	1676.45	7372.68
30/06/2015 10:04	225.499	58.041	1597.29	6933.66
30/06/2015 10:05	243.559	613.701	1642.1	7174.85
30/06/2015 10:06	277.669	187.357	1675.53	7134.63
30/06/2015 10:07	137.188	189.641	1684.89	7134.05
30/06/2015 10:08	58.9637	296.076	1728.74	7195.56
30/06/2015 10:09	87.7991	212.279	1696.3	7126.99
30/06/2015 10:10	175.001	-88.2539	1534.38	6777.31
30/06/2015 10:11	120.947	379.774	1621.45	6948.14
30/06/2015 10:12	183.048	-35.2998	1599.9	6907.52
30/06/2015 10:13	207.54	120.401	1518.41	6697.2
30/06/2015 10:14	114.69	16.4834	1439.78	6224.18
30/06/2015 10:15	117.048	585.056	1458.48	6531.59
30/06/2015 10:16	209.995	109.684	1504.91	6589.91
30/06/2015 10:17	309.002	29.9531	1499.23	6609.32
30/06/2015 10:18	178.434	78.5586	1501.43	6524.18
30/06/2015 10:19	-93.9307	196.86	1484.87	6274.69
30/06/2015 10:20	56.5504	479.992	1498.46	6432.06
30/06/2015 10:21	149.257	94.8838	1526.94	6541.95
30/06/2015 10:22	-540.917	-2.61328	1688.35	7050.39
30/06/2015 10:23	-738.07	-291.741	1572.84	6855.02
30/06/2015 10:24	-135.735	604.43	1766.5	7419.08
30/06/2015 10:25	382.509	-576.389	1829.59	7976.77
30/06/2015 10:26	285.341	-1627.62	1582.93	6995.16
30/06/2015 10:27	280.196	465.524	1452.7	6595.03
30/06/2015 10:28	198.74	735.268	1365.93	6350.87
30/06/2015 10:29	-106.537	43.3066	1201	5599.7
30/06/2015 10:30	-243.673	395.588	1107.32	5330.76
30/06/2015 10:31	57.293	410.04	1158.8	5467.74
30/06/2015 10:32	348.884	-508.062	1074.93	5167.22
30/06/2015 10:33	79.9001	-195.855	1030.3	5098.14
30/06/2015 10:34	175.381	343.623	1137.95	5241.56
30/06/2015 10:35	279.195	323.784	1175.35	5350.29
30/06/2015 10:36	-38.2494	199.179	1359.56	5930.03
30/06/2015 10:37	-76.395	-76.5518	1357.64	5948.26
30/06/2015 10:38	-346.242	166.035	1277.3	5676.02
30/06/2015 10:39	-427.885	-26.4805	1326.33	5685.83
30/06/2015 10:40	-33.7044	318.838	1339.62	6456.2
30/06/2015 10:41	81.785	-1244.19	1208.83	5591.02
30/06/2015 10:42	234.372	-108.856	1170.44	5503.78
30/06/2015 10:43	328.216	195.81	1150.14	5473.04
30/06/2015 10:44	231.775	-178.059	1012.24	4678.91
30/06/2015 10:45	298.562	742.812	1032.55	4902.38
30/06/2015 10:46	644.242	353.43	1106.7	5057.72
30/06/2015 10:47	673.568	72.5146	1057.22	5069.64
30/06/2015 10:48	298.889	625.347	1227.48	5577.52
30/06/2015 10:49	375.367	458.254	1213.32	5367.3
30/06/2015 10:50	842.268	720.889	1224.62	5512.23
30/06/2015 10:51	661.525	77.5654	1306.06	5517.18
30/06/2015 10:52	-261.512	767.907	1535.11	6198.5
30/06/2015 10:53	-1008.72	450.283	1328.89	5842.27
30/06/2015 10:54	-1568.82	563.837	1194.6	5267.82
30/06/2015 10:55	-340.957	391.818	1429.56	5987.09
30/06/2015 10:56	719.709	-1057.49	1814.53	7482.22
30/06/2015 10:57	-1029.07	-4000.4	1044.56	5022.39
30/06/2015 10:58	-2168.64	2228.58	1330	6055.25
30/06/2015 10:59	-467.184	1307.34	1681.33	7372.94
30/06/2015 11:00	590.058	-2197.28	1666.07	7101.3
30/06/2015 11:01	-222.803	-3428.67	1252.38	5430.16
30/06/2015 11:02	1036.88	3341.22	2289.18	9212.11
30/06/2015 11:03	810.922	-2832.12	1182.4	5889.83
30/06/2015 11:04	18.3576	989.855	1158.04	5138.14
30/06/2015 11:05	-247.331	966.087	819.743	4235.16
30/06/2015 11:06	-259.075	1762.35	1086.2	4920.77
30/06/2015 11:07	-83.0093	-1123.41	850.456	4339.8
30/06/2015 11:08	61.3931	-18.3115	875.667	4376.13
30/06/2015 11:09	429.292	-385.188	833.908	4142.03
30/06/2015 11:10	367.923	-238.469	753.849	3796.42
30/06/2015 11:11	431.023	451.543	844.532	4020.69
30/06/2015 11:12	1072.75	447.839	797.125	3996.4
30/06/2015 11:13	1073.13	176.018	703.418	3613.32
30/06/2015 11:14	-22.8056	1020.22	1048.64	4239.29
30/06/2015 11:15	-2314.55	336.218	722.904	3698.17
30/06/2015 11:16	-2943.87	1704.9	797.2	4147.66
30/06/2015 11:17	-391.07	2632.5	3275.75	9642.65
30/06/2015 11:18	1341.09	-10505.5	668.061	3503.32
30/06/2015 11:19	853.761	1970.26	2145.07	6334.65
30/06/2015 11:20	4814.69	-2999.96	854.834	4483.36
30/06/2015 11:21	8104.97	4029.59	1412.67	4735.87
30/06/2015 11:22	598.635	931.511	2344.19	5490.07
30/06/2015 11:23	-726.463	4800.15	742.005	4138.24
30/06/2015 11:24	-900.865	12131.7	1614.23	6114.3
30/06/2015 11:25	-1212.55	-2352.28	939.51	4438.89
30/06/2015 11:26	-308.29	-386.927	852.042	4252.94
30/06/2015 11:27	745.772	54.125	1494.06	5829.77
30/06/2015 11:28	245.489	-2847.79	1042.4	4988.92
30/06/2015 11:29	195.182	527.156	995.524	4566.79
30/06/2015 11:30	710.879	658.692	923.035	4485.82
30/06/2015 11:31	219.349	17.7422	903.95	4358.94
30/06/2015 11:32	-598.562	347.812	939.345	4615.06
30/06/2015 11:33	-329.357	1519.17	1319.46	5803.8
30/06/2015 11:34	80.4605	-939.908	1168.33	5332.77
30/06/2015 11:35	815.532	-231.077	1074.54	5189.35
30/06/2015 11:36	572.016	-514.073	875.003	4252.44
30/06/2015 11:37	1944.46	961.535	958.835	4671.84
30/06/2015 11:38	2032.79	1028.4	1004.61	4761.61
30/06/2015 11:39	668.576	260.876	957.321	4470.91
30/06/2015 11:40	222.085	2735.89	916.143	4628.3
30/06/2015 11:41	282.871	2077.82	899.556	4529.32
30/06/2015 11:42	354.119	67.2754	886.492	4614.12
30/06/2015 11:43	235.086	-47.251	877.922	4589.75
30/06/2015 11:44	105.254	259.031	875.603	4410.23
30/06/2015 11:45	81.421	405.184	888.144	4471.61
30/06/2015 11:46	155.025	176.487	923.753	4526.06
30/06/2015 11:47	93.7764	58.2793	956.845	4624.76
30/06/2015 11:48	63.8786	44.832	962.127	4698.93
30/06/2015 11:49	84.5386	411.849	1111.47	5249.51
30/06/2015 11:50	40.3543	-63.4199	1146.11	5431.61
30/06/2015 11:51	15.8548	-258.629	1050.73	5030.68
30/06/2015 11:52	212.55	260.596	1018.28	4958.05
30/06/2015 11:53	302.664	134.672	1062.43	5088.13
30/06/2015 11:54	201.859	-199.164	1008.87	4793.96
30/06/2015 11:55	51.0626	477.41	1034.61	4994.47
30/06/2015 11:56	175.842	100.279	955.613	4733.98
30/06/2015 11:57	384.028	-71.8545	775.659	4060.04
30/06/2015 11:58	257.862	350.91	800.967	4067.4
30/06/2015 11:59	228.69	127.949	740.615	3849.12
30/06/2015 12:00	136.921	436.133	714.8	3833.5
30/06/2015 12:01	391.84	411.515	823.415	4193.87
30/06/2015 12:02	582.537	-1.56934	789.534	4190.75
30/06/2015 12:03	125.65	93.8369	790.283	4170.04
30/06/2015 12:04	-307.721	446.188	744.796	3960.79
30/06/2015 12:05	-502.303	755.452	839.508	4404.22
30/06/2015 12:06	-268.79	-330.059	838.711	4485.28
30/06/2015 12:07	156.681	-567.664	899.607	4388.44
30/06/2015 12:08	92.1256	-488.201	926.263	4600.22
30/06/2015 12:09	-65.5271	-445.011	790.188	4203.17
30/06/2015 12:10	-41.8115	192	712.069	3897.87
30/06/2015 12:11	28.7004	143.985	654.553	3683.28
30/06/2015 12:12	71.1787	-176.135	598.81	3393.01
30/06/2015 12:13	84.8729	57.0244	578.199	3276.98
30/06/2015 12:14	89.6798	-12.9404	482.629	3001.3
30/06/2015 12:15	77.5843	184.604	502.24	2951.56
30/06/2015 12:16	179.042	17.9395	455.829	2782.5
30/06/2015 12:17	96.7153	178.839	430.851	2797.92
30/06/2015 12:18	-95.6964	199.794	487.635	3029.86
30/06/2015 12:19	-20.1042	132.879	485.632	3109.04
30/06/2015 12:20	70.0422	-420.508	369.041	2384.41
30/06/2015 12:21	90.2192	187.25	332.907	2337.85
30/06/2015 12:22	105.724	170.897	395.429	2548.32
30/06/2015 12:23	119.025	-11.0259	388.078	2534.48
30/06/2015 12:24	187.83	114.843	386.047	2546.61
30/06/2015 12:25	126.971	-30.9058	330.318	2379.2
30/06/2015 12:26	73.6543	135.506	309.716	2168.87
30/06/2015 12:27	157.66	398.493	346.904	2320.54
30/06/2015 12:28	86.0373	14.2241	335.099	2327.99
30/06/2015 12:29	11.0726	2.68457	311.711	2221.9
30/06/2015 12:30	10.9664	445.628	378.579	2627.85
30/06/2015 12:31	-6.53202	-282.242	341.159	2398.92
30/06/2015 12:32	50.0002	113.025	375.372	2431.21
30/06/2015 12:33	134.831	-9.69629	353.492	2469.63
30/06/2015 12:34	98.3661	170.823	471.327	2884.05
30/06/2015 12:35	152.152	-152.066	421.981	2864.27
30/06/2015 12:36	65.2386	68.2139	360.35	2577.12
30/06/2015 12:37	101.714	278.743	395.42	2655.17
30/06/2015 12:38	295.262	133.479	360.417	2706.27
30/06/2015 12:39	211.598	141.533	446.304	2951.73
30/06/2015 12:40	205.689	-50.979	379.385	2644.07
30/06/2015 12:41	202.748	528.742	356.532	2550.44
30/06/2015 12:42	169.555	116.988	336.001	2329.88
30/06/2015 12:43	128.183	442.429	375.457	2606.79
30/06/2015 12:44	108.743	28.6953	342.62	2529.07
30/06/2015 12:45	104.906	131.851	321.334	2386.36
30/06/2015 12:46	134.235	402.752	409.047	2825.55
30/06/2015 12:47	130.64	-369.269	301.232	2341.09
30/06/2015 12:48	101.783	240.75	281.747	2096.58
30/06/2015 12:49	109.4	140.456	223.025	1823.6
30/06/2015 12:50	81.6801	396.588	275.531	2154.03
30/06/2015 12:51	70.1679	-29.6865	302.906	2310.73
30/06/2015 12:52	148.919	69.1562	297.011	2395.64
30/06/2015 12:53	179.135	64.1641	337.141	2424.21
30/06/2015 12:54	157.491	15.8389	322.91	2384.7
30/06/2015 12:55	146.849	273.397	340.201	2525.59
30/06/2015 12:56	-269.809	143.484	330.847	2594.18
30/06/2015 12:57	-939.059	32.9448	307.749	2407.62
30/06/2015 12:58	1179.89	288.578	343.556	2512.02
30/06/2015 12:59	1818.25	30.7744	781.791	3673.03
30/06/2015 13:00	310.87	-2082.93	469.442	2699.97
30/06/2015 13:01	185.487	3154.01	536.051	3722.22
30/06/2015 13:02	255.596	1666.01	572.767	3533.6
30/06/2015 13:03	231.889	-425.958	510.963	3505.45
30/06/2015 13:04	269.767	-268.08	341.523	2487.74
30/06/2015 13:05	-732.083	844.319	389.889	2745.08
30/06/2015 13:06	-246.287	171.029	449.963	2919.16
30/06/2015 13:07	601.884	360.103	516.54	3246.77
30/06/2015 13:08	-453.59	403.665	1513.97	6449.88
30/06/2015 13:09	-1569.27	-2235.02	1047.72	5794.12
30/06/2015 13:10	-2320.93	-1391.06	403.859	2823.91
30/06/2015 13:11	-1153.5	909.18	478.427	3147.96
30/06/2015 13:12	404.378	-336.583	1645.8	6692.59
30/06/2015 13:13	336.195	-6615.87	475.746	3248.39
30/06/2015 13:14	118.284	1420.51	495.47	3245.63
30/06/2015 13:15	103.717	544.444	522.146	3400.26
30/06/2015 13:16	122.975	193.953	524.014	3311.13
30/06/2015 13:17	90.926	-3.13916	477.989	3239.14
30/06/2015 13:18	80.9096	163.734	501.339	3256.14
30/06/2015 13:19	103.983	99.52	529.854	3184.6
30/06/2015 13:20	-116.398	155.466	528.034	3291.78
30/06/2015 13:21	-167.916	52.9097	543.913	3345.42
30/06/2015 13:22	107.974	163.81	576.062	3498.9
30/06/2015 13:23	-303.239	193.737	757.465	4501.67
30/06/2015 13:24	-794.198	-1278.35	461.6	3139.37
30/06/2015 13:25	-958.047	764.066	499.55	3335.92
30/06/2015 13:26	-728.079	-57.8779	812.394	4348.3
30/06/2015 13:27	62.7688	-1184.68	947.392	5194.14
30/06/2015 13:28	206.473	-2202.67	594.639	3778.41
30/06/2015 13:29	172.263	-53.3115	523.24	3341.32
30/06/2015 13:30	122.188	53.4902	424.547	2897.13
30/06/2015 13:31	35.8831	605.92	484.378	2994.98
30/06/2015 13:32	64.5337	145.188	495.499	3118.34
30/06/2015 13:33	-562.093	60.9951	500.622	3162.09
30/06/2015 13:34	-1201.97	11.1396	522.689	3242.95
30/06/2015 13:35	-911.93	1243.07	1007.18	5207.28
30/06/2015 13:36	-477.632	-2842.93	596.614	3641.47
30/06/2015 13:37	-57.3108	-206.806	1030.27	4323.89
30/06/2015 13:38	1798.48	-1791.28	562.751	3472.56
30/06/2015 13:39	2480.01	165.674	508.245	3143.77
30/06/2015 13:40	826.728	422.107	786.255	3590.2
30/06/2015 13:41	47.1463	1983.67	539.78	3237.48
30/06/2015 13:42	131.957	2864.48	468.889	2931.01
30/06/2015 13:43	337.433	617.924	660.697	3828.14
30/06/2015 13:44	246.201	-1008.13	599.014	3332.94
30/06/2015 13:45	141.699	251.289	469.374	2895.18
30/06/2015 13:46	747.978	744.22	454.73	2922.17
30/06/2015 13:47	1037.94	403.585	547.007	3328.67
30/06/2015 13:48	114.576	-215.741	501.48	3136.37
30/06/2015 13:49	-515.564	1631.67	713.985	4199.81
30/06/2015 13:50	-497.844	88.0322	681.309	3935.95
30/06/2015 13:51	-234.063	-100.642	728.966	4133.23
30/06/2015 13:52	-62.7659	-713.402	895.098	4484.67
30/06/2015 13:53	196.285	-1104.15	646.845	3822.45
30/06/2015 13:54	425.33	-100.9	473.48	2904.29
30/06/2015 13:55	418.079	553.999	577.031	3114.44
30/06/2015 13:56	201.55	130.216	505.178	3087.44
30/06/2015 13:57	10.5442	560.141	514.681	3020.73
30/06/2015 13:58	70.5676	556.751	541.072	3272.71
30/06/2015 13:59	112.007	-235.575	428.962	2802.56
30/06/2015 14:00	71.1406	65.0469	392.341	2576.67
30/06/2015 14:01	69.7881	277.124	402.297	2688.76
30/06/2015 14:02	105.668	96.7734	405.819	2726.35
30/06/2015 14:03	132.243	71.0718	437.219	2783.43
30/06/2015 14:04	98.9725	-99.2578	402.358	2455
30/06/2015 14:05	46.3766	239.806	388.103	2463.3
30/06/2015 14:06	57.9278	178.226	381.205	2544.62
30/06/2015 14:07	121.84	153.467	442.245	2727.6
30/06/2015 14:08	112.194	-126.854	423.354	2642.84
30/06/2015 14:09	99.9936	138.932	435.923	2713.66
30/06/2015 14:10	95.4705	115.396	444.532	2741.75
30/06/2015 14:11	20.7594	140.389	472.398	2835.18
30/06/2015 14:12	-31.1362	-26.9463	440.283	2700.61
30/06/2015 14:13	0.919271	210.983	452.273	2804.06
30/06/2015 14:14	28.5393	-155.303	398.19	2614.88
30/06/2015 14:15	61.7363	232.329	465.301	2869.25
30/06/2015 14:16	24.3976	-252.494	412.439	2643.97
30/06/2015 14:17	453.463	199.879	445.582	2707.56
30/06/2015 14:18	942.743	5.51123	417.672	2657.87
30/06/2015 14:19	636.968	76.0405	459.414	2723.51
30/06/2015 14:20	79.267	649.256	484.018	2876.75
30/06/2015 14:21	184.502	1092.16	468.953	2889.07
30/06/2015 14:22	209.815	408.194	455.508	2723.29
30/06/2015 14:23	83.9512	-170.824	422.746	2654.97
30/06/2015 14:24	73.5026	402.493	473.115	2952.22
30/06/2015 14:25	75.4153	-203.378	378.618	2553.5
30/06/2015 14:26	107.139	213.882	369.778	2453.62
30/06/2015 14:27	163.649	100.644	361.61	2428.67
30/06/2015 14:28	100.62	128.029	381.892	2495.41
30/06/2015 14:29	93.3259	52.5054	364.033	2423.23
30/06/2015 14:30	95.1423	223.646	394.514	2465.65
30/06/2015 14:31	-0.43807	33.6953	386.254	2465.25
30/06/2015 14:32	282.328	168.676	409.272	2616.87
30/06/2015 14:33	290.932	109.644	433.755	2802.66
30/06/2015 14:34	64.8096	-50.1929	517.362	2959.62
30/06/2015 14:35	4.28078	223.883	461.777	2842.89
30/06/2015 14:36	-165.245	331.161	433.252	2703.67
30/06/2015 14:37	108.495	129.466	459.237	2935.94
30/06/2015 14:38	117.129	-256.553	413.984	2690.06
30/06/2015 14:39	-106.057	189.645	588.183	3401.7
30/06/2015 14:40	-276.484	-329.521	440.446	2944.46
30/06/2015 14:41	-213.868	550.081	493.659	3142.68
30/06/2015 14:42	307.675	-147.553	561.719	3500.74
30/06/2015 14:43	301.747	-805.772	463.695	2948.84
30/06/2015 14:44	282.902	158.419	503.965	3079.68
30/06/2015 14:45	225.152	292.921	526.969	3181.4
30/06/2015 14:46	-22.7546	324.787	542.385	3385.06
30/06/2015 14:47	-425.752	32.0576	479.675	3105.37
30/06/2015 14:48	-184.023	175.339	416.688	2776.16
30/06/2015 14:49	64.4401	3.2373	416.484	2715.74
30/06/2015 14:50	96.5679	47.7114	579.364	3468.28
30/06/2015 14:51	155.887	-256.716	683.705	3983.27
30/06/2015 14:52	399.573	-42.7861	678.741	4062.14
30/06/2015 14:53	347.908	101.271	697.198	4091.16
30/06/2015 14:54	240.866	152.808	691.786	4066.47
30/06/2015 14:55	299.06	631.654	764.438	4383.43
30/06/2015 14:56	244.126	195.924	780.627	4503.6
30/06/2015 14:57	105.002	200.493	800.423	4646.53
30/06/2015 14:58	122.587	220.111	784.181	4566.71
30/06/2015 14:59	154.909	68.833	722.887	4113.6
30/06/2015 15:00	166.565	397.589	755.143	4273.23
30/06/2015 15:01	93.3726	9.56445	725.985	4227.55
30/06/2015 15:02	195.813	72.8877	677.188	3967.81
30/06/2015 15:03	226.912	271.332	659.317	3920.01
30/06/2015 15:04	134.824	-85.1729	575.74	3536.05
30/06/2015 15:05	30.37	575.681	641.299	3818.76
30/06/2015 15:06	25.1565	185.891	711.122	4014.33
30/06/2015 15:07	206.118	19.8633	723.379	4102.94
30/06/2015 15:08	179.113	61.4131	751.882	4374.34
30/06/2015 15:09	121.501	-112.877	758.205	4331.42
30/06/2015 15:10	163.681	203.928	751.475	4266.37
30/06/2015 15:11	152.533	215.059	751.46	4293.89
30/06/2015 15:12	88.0464	68.4531	745.281	4271.19
30/06/2015 15:13	133.194	176.448	726.98	4243.29
30/06/2015 15:14	121.457	193.564	747.211	4293.96
30/06/2015 15:15	101.85	189.192	794.612	4489.48
30/06/2015 15:16	194.795	-39.4033	751.294	4342.78
30/06/2015 15:17	351.924	267.263	773.024	4492.67
30/06/2015 15:18	201.975	95.6963	803.43	4642.36
30/06/2015 15:19	-89.5544	103.48	799.007	4481.01
30/06/2015 15:20	-333.925	400.626	760.534	4497.57
30/06/2015 15:21	-304.996	106.693	780.019	4369.97
30/06/2015 15:22	74.3105	361.838	961.838	5499.76
30/06/2015 15:23	116.451	-1429.13	824.466	4650.48
30/06/2015 15:24	86.7306	141.187	846.449	4656.44
30/06/2015 15:25	87.6	17.291	797.955	4543.22
30/06/2015 15:26	89.4594	247.063	820.177	4589.4
30/06/2015 15:27	261.443	-25.6348	774.979	4468.74
30/06/2015 15:28	192.329	-7.19043	729.342	4124.51
30/06/2015 15:29	61.311	217.02	731.667	4019.38
30/06/2015 15:30	123.459	484.337	749.302	4264.13
30/06/2015 15:31	135.384	161.432	809.638	4488.75
30/06/2015 15:32	192.609	-20.6816	866.288	4683.96
30/06/2015 15:33	150.711	13.7529	845.261	4624.26
30/06/2015 15:34	92.1609	166.234	829.541	4611.86
30/06/2015 15:35	163.077	274.641	840.019	4702.2
30/06/2015 15:36	111.895	164.785	918.21	4820.42
30/06/2015 15:37	164.778	-19.0605	905.348	4839.11
30/06/2015 15:38	313.381	185.594	883.201	4839.04
30/06/2015 15:39	218.306	-64.9189	806.388	4463.94
30/06/2015 15:40	71.8636	362.413	787.076	4423.63
30/06/2015 15:41	72.3966	634.763	875.728	4868.31
30/06/2015 15:42	218.828	-24.249	913.028	4910.4
30/06/2015 15:43	143.064	-81.5596	862.866	4849.69
30/06/2015 15:44	-22.3912	71.8496	872.735	4707.94
30/06/2015 15:45	50.5115	368.877	857.982	4889.2
30/06/2015 15:46	443.201	127.621	890.524	5090.43
30/06/2015 15:47	2783.11	-232.707	919.741	4989.7
30/06/2015 15:48	3545.77	131.641	921.237	5014.23
30/06/2015 15:49	2233.69	761.017	987.361	5296.74
30/06/2015 15:50	720.591	6112.7	1936.08	10325.6
30/06/2015 15:51	328.313	-1432.12	870.17	5348.72
30/06/2015 15:52	153.416	3873.57	826.172	4713.43
30/06/2015 15:53	183.857	154.215	806.353	4503.46
30/06/2015 15:54	1305.74	174.044	769.745	4389.42
30/06/2015 15:55	1101.93	234.184	772.138	4484.7
30/06/2015 15:56	-60.5259	312.961	871.223	4796.66
30/06/2015 15:57	154.412	2312.63	1048.82	6147.67
30/06/2015 15:58	210.297	-395.696	793.68	4532.15
30/06/2015 15:59	151.756	103.004	785.2	4448.58
30/06/2015 16:00	94.2202	204.262	782.813	4481.02
30/06/2015 16:01	154.033	269.072	779.427	4604.02
30/06/2015 16:02	169.616	-74.9707	720.64	4323.21
30/06/2015 16:03	155.813	195.57	721.801	4295.55
30/06/2015 16:04	96.0022	170.364	727.994	4219.89
30/06/2015 16:05	64.9464	318.27	761.735	4448.26
30/06/2015 16:06	161.38	14.8262	755.034	4435.07
30/06/2015 16:07	258.835	100.755	759.878	4494.86
30/06/2015 16:08	143.525	14.8984	756.763	4479.07
30/06/2015 16:09	37.7243	119.793	725.832	4243.64
30/06/2015 16:10	12.0793	322.676	711.096	4237.65
30/06/2015 16:11	47.8432	111.526	715.001	4258.14
30/06/2015 16:12	202.087	-63.7549	675.426	4206.47
30/06/2015 16:13	165.544	-29.4775	642.659	4079.75
30/06/2015 16:14	141.955	64.4072	620.726	3909.04
30/06/2015 16:15	144.288	386.782	656.826	4068.34
30/06/2015 16:16	160.915	11.5654	627.713	3982.59
30/06/2015 16:17	257.243	151.467	631.777	3918.65
30/06/2015 16:18	196.654	166.457	624.951	3911.08
30/06/2015 16:19	136.854	146.326	621.631	3827.8
30/06/2015 16:20	114.55	347.27	659.12	3931.42
30/06/2015 16:21	99.0328	82.1865	624.618	3921.97
30/06/2015 16:22	140.283	103.324	600.369	3893.55
30/06/2015 16:23	169.334	138.68	607.234	3917.47
30/06/2015 16:24	58.078	29.1475	600.763	3785.76
30/06/2015 16:25	16.5608	213.251	597.195	3805.89
30/06/2015 16:26	101.064	261.097	697.008	3917.17
30/06/2015 16:27	244.538	-229.593	592.796	3690.09
30/06/2015 16:28	185.777	111.843	574.647	3646.83
30/06/2015 16:29	77.3887	142.644	552.609	3595.69
30/06/2015 16:30	72.6911	307.898	560.616	3604.94
30/06/2015 16:31	58.4039	134.623	558.502	3565.55
30/06/2015 16:32	150.509	98.4053	565.433	3692.39
30/06/2015 16:33	156.181	-6.45703	548.972	3661.69
30/06/2015 16:34	81.1193	-62.667	511.125	3334.52
30/06/2015 16:35	70.1283	389.404	535.252	3486.14
30/06/2015 16:36	39.6591	65.7793	517.852	3474.03
30/06/2015 16:37	153.162	35.7051	521.248	3423.95
30/06/2015 16:38	178.581	53.4727	500.663	3369.61
30/06/2015 16:39	54.0774	-56	462.352	3101.11
30/06/2015 16:40	40.9322	285.948	445.016	3043.11
30/06/2015 16:41	86.4245	278.152	460.579	3127.29
30/06/2015 16:42	115.288	-54.0928	451.25	3126.63
30/06/2015 16:43	62.6022	36.1714	448.228	3121.49
30/06/2015 16:44	32.1102	61.6997	425.784	3002.62
30/06/2015 16:45	57.2107	154.73	426.026	2984.35
30/06/2015 16:46	70.4436	103.627	457.324	3086.89
30/06/2015 16:47	70.5935	21.9131	469.213	3223.06
30/06/2015 16:48	102.735	-74.9683	463.134	3034.65
30/06/2015 16:49	87.4827	163.812	454.355	3057.79
30/06/2015 16:50	63.8204	136.004	463.491	3204.81
30/06/2015 16:51	101.308	63.1465	474.479	3248.83
30/06/2015 16:52	168.056	-24.6401	441.944	3093.35
30/06/2015 16:53	141.784	152.214	444.445	3143.03
30/06/2015 16:54	80.2687	29.1001	408.85	2986.59
30/06/2015 16:55	81.7071	314.506	430.69	3097.96
30/06/2015 16:56	144.698	104.041	447.256	3174.19
30/06/2015 16:57	191.895	23.7739	451.156	3201.52
30/06/2015 16:58	133.435	135.409	486.665	3321.95
30/06/2015 16:59	93.2223	79.1587	462.12	3264.94
30/06/2015 17:00	58.2802	276.521	493.689	3385.46
30/06/2015 17:01	79.0483	33.5327	480.94	3404.64
30/06/2015 17:02	147.923	23.7856	473.223	3302.21
30/06/2015 17:03	110.594	45.8394	457.377	3220.87
30/06/2015 17:04	67.8965	82.7402	440.814	3101.28
30/06/2015 17:05	52.1778	225.817	447.912	3165.59
30/06/2015 17:06	133.199	60.6289	437.557	3180.02
30/06/2015 17:07	216.158	35.0947	443.647	3150.67
30/06/2015 17:08	-478.408	65.3208	447.584	3173.76
30/06/2015 17:09	-1188.67	120.696	417.988	3082.97
30/06/2015 17:10	-627.095	338.707	445.334	3271.56
30/06/2015 17:11	34.0526	240.767	885.391	5585.63
30/06/2015 17:12	112.22	-3837.71	461.71	3346.23
30/06/2015 17:13	97.2034	694.183	446.712	3198.07
30/06/2015 17:14	80.01	398.665	430.324	3106.33
30/06/2015 17:15	61.3717	196.227	470.055	3168.79
30/06/2015 17:16	144.924	36.7666	461.711	3167.42
30/06/2015 17:17	247.506	83.856	454.038	3194.91
30/06/2015 17:18	143.38	-6.59912	435.004	3097.37
30/06/2015 17:19	-0.606176	206.763	439.851	3017.96
30/06/2015 17:20	147.304	278.957	426.931	3094.26
30/06/2015 17:21	262.205	67.5137	429.204	3105.67
30/06/2015 17:22	106.177	51.813	503.6	3343.24
30/06/2015 17:23	127.442	28.4126	442.394	3244.44
30/06/2015 17:24	106.214	362.811	435.196	3181.9
30/06/2015 17:25	71.9578	225.251	448.46	3318.18
30/06/2015 17:26	87.0235	62.5752	458.601	3296.49
30/06/2015 17:27	189.346	105.196	453.655	3313.03
30/06/2015 17:28	148.427	59.5576	451.83	3339.32
30/06/2015 17:29	129.482	79.9277	464.391	3311.23
30/06/2015 17:30	122.555	323.828	506.796	3528.24
30/06/2015 17:31	115.697	-7.37012	478.561	3527.61
30/06/2015 17:32	174.646	97.2715	474.179	3451.81
30/06/2015 17:33	149.136	180.66	469.163	3520.85
30/06/2015 17:34	115.469	6.50684	434.523	3333.73
30/06/2015 17:35	88.2599	314.163	449.252	3441.99
30/06/2015 17:36	109.221	70.0806	438.316	3432.46
30/06/2015 17:37	157.673	108.353	429.565	3444.02
30/06/2015 17:38	108.44	58.7236	417.203	3420.25
30/06/2015 17:39	53.4977	140.326	431.929	3423.01
30/06/2015 17:40	74.3375	227.129	442.084	3593.94
30/06/2015 17:41	95.0819	23.7471	446.18	3659.24
30/06/2015 17:42	138.415	16.0898	452.685	3699.51
30/06/2015 17:43	148.71	94.373	447.825	3773.51
30/06/2015 17:44	107	79.8359	461.278	3768.58
30/06/2015 17:45	106.135	238.516	453.077	3941.83
30/06/2015 17:46	125.627	90.0088	452.136	3977.84
30/06/2015 17:47	209.841	57.6055	442.191	3954.92
30/06/2015 17:48	171.107	125.296	438.213	3972.01
30/06/2015 17:49	89.8133	95.2637	426.669	3889.8
30/06/2015 17:50	52.8684	295.262	441.464	3953.19
30/06/2015 17:51	69.3321	125.815	429.15	3981.47
30/06/2015 17:52	193.474	58.6016	430.625	4019.34
30/06/2015 17:53	190.657	19.0283	421.103	4032.17
30/06/2015 17:54	110.457	28.4062	407.379	3911.24
30/06/2015 17:55	61.6403	285.788	397.958	3986.28
30/06/2015 17:56	102.371	169.991	403.369	4005.85
30/06/2015 17:57	186.717	87.6279	401.773	4070.61
30/06/2015 17:58	142.384	-15.5684	380.278	4030.67
30/06/2015 17:59	55.8121	129.2	371.518	3982.27
30/06/2015 18:00	38.3166	267.009	407.734	4058.38
30/06/2015 18:01	126.997	85.749	413.371	4095.01
30/06/2015 18:02	119.74	-22.5352	398.246	4070.87
30/06/2015 18:03	49.6506	48.2832	402.688	4073.29
30/06/2015 18:04	68.1052	160.055	397.112	4061.87
30/06/2015 18:05	61.5448	137.354	421.69	4151.94
30/06/2015 18:06	87.3473	-5.5293	406.107	4255.3
30/06/2015 18:07	171.066	63.5459	413.383	4302.36
30/06/2015 18:08	117.06	59.291	407.904	4364.56
30/06/2015 18:09	67.7346	60.1777	404.818	4326.73
30/06/2015 18:10	105.412	249.916	416.267	4454.51
30/06/2015 18:11	168.306	-3.45215	405.438	4393.18
30/06/2015 18:12	223.391	94.8691	417.272	4432.02
30/06/2015 18:13	291.091	119.187	405.555	4480.09
30/06/2015 18:14	180.072	132.049	398.788	4345.22
30/06/2015 18:15	56.5456	356.441	420.936	4492.91
30/06/2015 18:16	-314.313	323.743	413.534	4714.16
30/06/2015 18:17	2750.32	23.1953	410.472	4678.77
30/06/2015 18:18	4994.01	-72.8311	392.854	4491.98
30/06/2015 18:19	3298.52	170.078	670.513	5858.65
30/06/2015 18:20	890.178	4554.05	849.991	8209.76
30/06/2015 18:21	362.139	3581.06	434.569	5379.25
30/06/2015 18:22	149.134	3399.53	361.662	4325.63
30/06/2015 18:23	131.756	195.422	364.103	4417.65
30/06/2015 18:24	101.134	34.293	356.232	4355.85
30/06/2015 18:25	79.1564	250.077	368.147	4505.79
30/06/2015 18:26	51.3415	53.5703	372.169	4521.43
30/06/2015 18:27	79.2075	32.3447	348.145	4440.76
30/06/2015 18:28	96.3058	158.528	360.7	4537.24
30/06/2015 18:29	70.976	-10.0566	374.463	4516.64
30/06/2015 18:30	68.423	153.565	368.981	4627.98
30/06/2015 18:31	87.2696	-17.6787	363.498	4456.33
30/06/2015 18:32	267.897	158.727	373.814	4506.47
30/06/2015 18:33	209.176	65.4004	352.258	4584.42
30/06/2015 18:34	89.5493	6.61133	343.041	4411.3
30/06/2015 18:35	105.416	459.63	338.486	4594.64
30/06/2015 18:36	162.981	174.734	350.436	4757.51
30/06/2015 18:37	285.445	8.92676	370.913	4856.14
30/06/2015 18:38	228.771	0.459961	351.992	4727.32
30/06/2015 18:39	137.394	99.6406	312.689	4335.03
30/06/2015 18:40	96.9776	451.478	305.155	4369.11
30/06/2015 18:41	99.7445	167.072	300.188	4311.88
30/06/2015 18:42	234.812	99.7256	307.671	4259.88
30/06/2015 18:43	221.779	57.8145	286.023	4192.95
30/06/2015 18:44	129.928	20.2588	281.136	3870.48
30/06/2015 18:45	54.0729	529.079	293.322	4164.7
30/06/2015 18:46	80.5966	59.9336	279.703	4149.44
30/06/2015 18:47	226.039	39.6787	267.483	4027.78
30/06/2015 18:48	200.286	-7.98242	263.024	3835.42
30/06/2015 18:49	168.551	146.347	245.858	3764.31
30/06/2015 18:50	104.15	343.612	251.498	3940.83
30/06/2015 18:51	242.815	320.6	275.534	4465.87
30/06/2015 18:52	778.667	61.5088	289.039	4789.39
30/06/2015 18:53	711.403	65.7021	311.588	5086.1
30/06/2015 18:54	400.376	452.259	364.579	5809.26
30/06/2015 18:55	226.321	610.377	362.157	5932.43
30/06/2015 18:56	145.693	543.155	349.005	5747.57
30/06/2015 18:57	144.908	291.431	340.218	5675.74
30/06/2015 18:58	135.267	109.882	320.153	5546.8
30/06/2015 18:59	50.4421	128.259	315.682	5434.57
30/06/2015 19:00	67.7379	271.132	308.851	5532
30/06/2015 19:01	138.103	58.584	304.115	5446.89
30/06/2015 19:02	294.203	-2.39648	298.193	5338.18
30/06/2015 19:03	255.905	95.7881	276.361	5290.15
30/06/2015 19:04	159.558	98.1475	275.536	5004.92
30/06/2015 19:05	128.689	491.661	266.132	5188.05
30/06/2015 19:06	130.816	134.894	251.725	5147.43
30/06/2015 19:07	248.062	103.908	250.107	5074.46
30/06/2015 19:08	273.802	115.991	239.933	5017.05
30/06/2015 19:09	186.44	149.375	235.6	4992.21
30/06/2015 19:10	265.283	316.838	231.888	5050.27
30/06/2015 19:11	268.811	255.847	228.336	5033.67
30/06/2015 19:12	123.796	229.054	230.915	5212.4
30/06/2015 19:13	166.345	223.57	226.014	5215.84
30/06/2015 19:14	157.268	103.253	200.326	4788.9
30/06/2015 19:15	145.469	332.467	194.254	4829.78
30/06/2015 19:16	136.955	166.473	194.001	4814.49
30/06/2015 19:17	184.407	144.422	185.993	4787.63
30/06/2015 19:18	190.614	165.986	187.029	4812.99
30/06/2015 19:19	130.285	43.7695	173.62	4612.09
30/06/2015 19:20	98.948	307.686	171.726	4701.03
30/06/2015 19:21	105.364	189.253	168.574	4795.17
30/06/2015 19:22	130.128	85.2207	167.726	4854.78
30/06/2015 19:23	134.541	86.6172	161.89	4927.13
30/06/2015 19:24	99.0653	127.157	168.305	5047.57
30/06/2015 19:25	75.0231	153.232	166.833	5155.71
30/06/2015 19:26	116.863	84.8516	155.952	5163.33
30/06/2015 19:27	247.294	91.0293	150.542	5188.72
30/06/2015 19:28	201.73	70.0938	158.21	5218.24
30/06/2015 19:29	116.163	54.4102	145.541	5047.64
30/06/2015 19:30	85.5029	382.465	140.701	5187.11
30/06/2015 19:31	144.382	145.18	140.586	5254.53
30/06/2015 19:32	228.835	15.4287	130.989	5192.6
30/06/2015 19:33	174.023	73.0342	126.592	5133.02
30/06/2015 19:34	132.476	135.272	127.443	4946.26
30/06/2015 19:35	130.88	322.201	122.259	5032.63
30/06/2015 19:36	150.477	101.056	109.751	5025.38
30/06/2015 19:37	200.444	81.8164	112.043	4933
30/06/2015 19:38	199.173	166.179	114.785	4925.86
30/06/2015 19:39	147.959	119.849	106.042	4817.25
30/06/2015 19:40	87.1285	283.449	101.918	4897.02
30/06/2015 19:41	113.274	166.216	98.1194	4909.35
30/06/2015 19:42	195.943	125.019	98.0713	4924.14
30/06/2015 19:43	171.403	40.4229	89.1119	4908.86
30/06/2015 19:44	143.546	101.768	86.6739	4818.56
30/06/2015 19:45	156.56	276.031	87.1879	4925.19
30/06/2015 19:46	146.486	145.575	89.2216	5015.27
30/06/2015 19:47	151.537	125.165	84.5345	5101.68
30/06/2015 19:48	126.693	133.711	80.5099	5119.15
30/06/2015 19:49	70.8022	173.547	85.0151	5217.09
30/06/2015 19:50	58.4888	251.625	87.6217	5460.31
30/06/2015 19:51	100.323	75.002	93.0145	5644.27
30/06/2015 19:52	242.634	50.3896	93.2185	5849.86
30/06/2015 19:53	183.269	-58.6973	89.6216	5797.59
30/06/2015 19:54	98.0654	90.5088	85.6226	5652.67
30/06/2015 19:55	87.2572	384.493	84.8426	5824.16
30/06/2015 19:56	150.995	137.34	83.726	5975.91
30/06/2015 19:57	287.481	33.2354	86.3447	6073.75
30/06/2015 19:58	221.943	72.9463	79.585	6157.89
30/06/2015 19:59	132.673	101.603	76.0913	6021.79
30/06/2015 20:00	87.5582	488.095	79.773	6319.75
30/06/2015 20:01	117.391	65.9375	80.6675	6365.31
30/06/2015 20:02	218.953	77.9941	72.0353	6397
30/06/2015 20:03	213.852	128.895	77.8187	6567.08
30/06/2015 20:04	202.933	3.37207	74.3076	6412.72
30/06/2015 20:05	145.209	323.273	73.4129	6524.42
30/06/2015 20:06	128.354	154.813	74.2252	6516.53
30/06/2015 20:07	232.986	224.973	73.3664	6574.26
30/06/2015 20:08	225.622	110.404	65.5244	6622.41
30/06/2015 20:09	195.918	21.5635	57.8788	6407.14
30/06/2015 20:10	171.147	381.944	59.2873	6527.5
30/06/2015 20:11	193.274	156.636	66.4933	6501.57
30/06/2015 20:12	263.521	210.45	64.6848	6553.48
30/06/2015 20:13	228.226	164.335	65.6653	6615.56
30/06/2015 20:14	140.177	56.2549	53.4963	6295.76
30/06/2015 20:15	83.8015	436.704	48.6211	6436.5
30/06/2015 20:16	166.17	207.703	55.5086	6585.26
30/06/2015 20:17	307.481	-7.10742	47.5836	6505.45
30/06/2015 20:18	237.533	142.276	54.4313	6614.01
30/06/2015 20:19	130.805	84.6514	46.817	6413.15
30/06/2015 20:20	122.731	436.18	43.8063	6535.57
30/06/2015 20:21	196.255	134.271	39.0943	6503.48
30/06/2015 20:22	254.303	94.4912	40.3981	6504.74
30/06/2015 20:23	202.147	120.394	38.5282	6510.51
30/06/2015 20:24	157.86	177.39	32.5952	6364.44
30/06/2015 20:25	133.065	383.159	31.619	6535.62
30/06/2015 20:26	121.213	91.6992	34.0398	6524.37
30/06/2015 20:27	125.891	131.308	30.0434	6509.56
30/06/2015 20:28	112.496	136.309	28.8394	6527.91
30/06/2015 20:29	117.985	57.0342	30.5535	6383.99
30/06/2015 20:30	121.156	229.471	28.3113	6504.05
30/06/2015 20:31	122.792	44.0352	28.3663	6490.86
30/06/2015 20:32	207.139	84.3535	23.1166	6398.38
30/06/2015 20:33	179.773	199.699	25.7177	6479.18
30/06/2015 20:34	108.729	7.91699	22.0379	6261.1
30/06/2015 20:35	84.0519	375.79	20.9019	6420.29
30/06/2015 20:36	145.003	73.4912	21.5456	6375.06
30/06/2015 20:37	338.424	104.699	13.7865	6412.42
30/06/2015 20:38	281.395	66.5215	13.9844	6429.75
30/06/2015 20:39	205.353	79.6787	2.87049	6201.62
30/06/2015 20:40	246.315	606.027	8.97408	6548.24
30/06/2015 20:41	242.61	67.9678	5.96926	6503.74
30/06/2015 20:42	177.781	166.203	2.72496	6455.61
30/06/2015 20:43	180.803	282.806	2.60041	6440.23
30/06/2015 20:44	143.168	153.288	-1.58601	6187.98
30/06/2015 20:45	139.942	353.756	-0.324781	6356.55
30/06/2015 20:46	189.333	110.991	2.24887	6382.31
30/06/2015 20:47	247.912	51.3281	4.39526	6231.27
30/06/2015 20:48	202.088	211.11	8.89708	6249.99
30/06/2015 20:49	93.7942	114.032	-1.06494	6010.05
30/06/2015 20:50	48.1654	386.19	4.76364	6096.38
30/06/2015 20:51	123.671	120.374	3.44545	6052.6
30/06/2015 20:52	253.896	90.6475	3.66967	6125.97
30/06/2015 20:53	204.433	-15.3057	4.01166	6104.06
30/06/2015 20:54	170.6	138.368	-4.36101	6017.98
30/06/2015 20:55	179.575	347.485	5.19343	6135.5
30/06/2015 20:56	216.316	107.046	1.56489	6105.05
30/06/2015 20:57	286.82	172.977	2.48214	6114.93
30/06/2015 20:58	212.663	150.407	0.068668	6048.16
30/06/2015 20:59	121.706	202.899	6.01809	5877.4
30/06/2015 21:00	101.42	358.436	-0.653679	5922.21
30/06/2015 21:01	182.364	182.383	5.12581	5973.61
30/06/2015 21:02	368.328	21.3398	2.14926	5903.73
30/06/2015 21:03	291.129	89.1777	-0.00195712	5828.15
30/06/2015 21:04	147.225	136.768	-6.40958	5515.88
30/06/2015 21:05	91.0217	551.564	5.07425	5635.8
30/06/2015 21:06	161.311	210.213	5.48052	5669.02
30/06/2015 21:07	329.87	23.3613	1.04278	5585.2
30/06/2015 21:08	265.276	85.6631	-0.107304	5550.9
30/06/2015 21:09	169.477	118.524	2.8136	5294.56
30/06/2015 21:10	162.189	477.045	-0.44646	5406.88
30/06/2015 21:11	187.458	197.886	3.90422	5431.99
30/06/2015 21:12	253.029	65.6582	0.746744	5330.99
30/06/2015 21:13	201.235	152.979	0.173239	5214.9
30/06/2015 21:14	91.6916	179.338	-0.989933	5020.93
30/06/2015 21:15	57.7253	401.026	-2.65521	5162.31
30/06/2015 21:16	124.032	102.358	-3.09026	5136.83
30/06/2015 21:17	219.918	30.8242	-4.77713	5097.28
30/06/2015 21:18	171.036	61.1992	-3.51536	5104.38
30/06/2015 21:19	122.73	82.8906	-3.4883	4904.33
30/06/2015 21:20	71.8543	343.471	8.95914	5018.6
30/06/2015 21:21	59.2795	76.9814	-2.4681	5004.82
30/06/2015 21:22	178.477	129.549	-2.9009	5052.08
30/06/2015 21:23	184.451	-18.127	5.63844	4935.67
30/06/2015 21:24	159.336	64.6475	13.5096	4836.38
30/06/2015 21:25	133.015	262.864	11.0945	4909.24
30/06/2015 21:26	136.79	136.424	4.21757	4871.74
30/06/2015 21:27	216.418	138.202	10.3876	4800.13
30/06/2015 21:28	190.303	135.838	11.755	4770.5
30/06/2015 21:29	149.39	89.3516	11.8827	4604.01
30/06/2015 21:30	116.59	307.483	16.798	4661.45
30/06/2015 21:31	131.269	136.842	12.5063	4634.4
30/06/2015 21:32	237.674	149.526	15.2205	4649.44
30/06/2015 21:33	208.349	120.194	13.0198	4718.01
30/06/2015 21:34	171.829	46.6553	5.47768	4553.08
30/06/2015 21:35	189.763	356.805	22.442	4642.79
30/06/2015 21:36	196.411	162.97	11.5742	4697.35
30/06/2015 21:37	242.838	109.992	16.9654	4632.88
30/06/2015 21:38	231.249	243.253	17.732	4678.82
30/06/2015 21:39	184.229	106.196	21.1165	4472.29
30/06/2015 21:40	188.6	427.654	7.69082	4687.01
30/06/2015 21:41	237.215	135.294	18.6401	4687.72
30/06/2015 21:42	297.06	123.812	15.9857	4615.04
30/06/2015 21:43	232.498	216.904	23.299	4594.86
30/06/2015 21:44	155.461	204.146	20.5469	4421.43
30/06/2015 21:45	142.373	419.756	12.3154	4561.9
30/06/2015 21:46	180.308	142.965	6.43047	4576.69
30/06/2015 21:47	261.507	97.6289	18.1342	4528.97
30/06/2015 21:48	222.65	121.587	21.5375	4456.59
30/06/2015 21:49	149.931	181.936	5.50566	4345.64
30/06/2015 21:50	131.656	345.113	11.9233	4411.96
30/06/2015 21:51	136.834	169.578	17.9445	4406.14
30/06/2015 21:52	166.674	108.574	8.68197	4404.37
30/06/2015 21:53	160.44	114.255	8.90916	4373.88
30/06/2015 21:54	115.391	114.34	30.9146	4247.44
30/06/2015 21:55	114.736	259.938	20.5168	4357.86
30/06/2015 21:56	160.053	119.486	11.4848	4389.27
30/06/2015 21:57	242.298	78.2295	14.1003	4374.88
30/06/2015 21:58	226.762	97.6377	14.1406	4321.67
30/06/2015 21:59	175.18	134.797	11.9394	4131.38
30/06/2015 22:00	163.968	401.302	19.482	4294.98
30/06/2015 22:01	166.752	111.641	24.2322	4225.32
30/06/2015 22:02	202.968	172.651	18.0144	4221
30/06/2015 22:03	201.47	168.043	21.4787	4229.25
30/06/2015 22:04	168.983	94.9131	11.5648	4049.84
30/06/2015 22:05	168.886	334.455	14.8998	4151.31
30/06/2015 22:06	182.762	133.947	13.9467	4108.29
30/06/2015 22:07	197.712	181.657	15.3813	4131.32
30/06/2015 22:08	171.253	137.549	18.5598	4078.38
30/06/2015 22:09	141.256	189.594	17.3636	4022.92
30/06/2015 22:10	140.108	255.019	15.2355	4102.24
30/06/2015 22:11	154.474	111.517	13.0022	4077.6
30/06/2015 22:12	182.22	143.264	11.4982	4091.78
30/06/2015 22:13	147.692	117.738	9.44302	4055.04
30/06/2015 22:14	116.441	142.892	5.30664	3962.24
30/06/2015 22:15	125.614	259.75	7.72645	4050.79
30/06/2015 22:16	162.726	80.6348	17.5316	4024.12
30/06/2015 22:17	255.651	107.962	22.9914	4017.78
30/06/2015 22:18	223.379	108.629	18.171	3971.56
30/06/2015 22:19	183.324	162.174	11.7657	3867.49
30/06/2015 22:20	179.755	362.052	16.6726	3986.29
30/06/2015 22:21	177.013	143.065	10.8981	3973.07
30/06/2015 22:22	239.562	165.358	15.8177	3952.98
30/06/2015 22:23	223.797	193.091	13.4308	3976.75
30/06/2015 22:24	167.18	121.844	10.2305	3855.31
30/06/2015 22:25	132.863	335.06	14.3751	3929.84
30/06/2015 22:26	149.677	174.838	3.98173	3925.02
30/06/2015 22:27	235.919	143.175	6.39493	3917.21
30/06/2015 22:28	194.716	108.039	14.0192	3886.81
30/06/2015 22:29	115.028	122.414	1.03441	3772.2
30/06/2015 22:30	112.837	315.417	13.9278	3820.77
30/06/2015 22:31	121.247	166.754	5.70356	3874.52
30/06/2015 22:32	152.603	21.6045	8.3747	3789.88
30/06/2015 22:33	168.383	137.677	10.6486	3769.2
30/06/2015 22:34	132.377	85.5708	16.435	3627.04
30/06/2015 22:35	108.362	258.175	15.9182	3705.87
30/06/2015 22:36	125.383	156.912	19.5452	3744.25
30/06/2015 22:37	166.784	92.3062	23.6716	3730.81
30/06/2015 22:38	139.306	83.4927	11.9744	3702.74
30/06/2015 22:39	125.456	145.191	22.1955	3679.28
30/06/2015 22:40	136.011	144.011	21.2879	3626.36
30/06/2015 22:41	160.509	178.859	21.3831	3691.7
30/06/2015 22:42	227.383	84.7129	14.466	3682.9
30/06/2015 22:43	191.33	153.016	18.4874	3690.43
30/06/2015 22:44	154.328	110.999	12.949	3540.37
30/06/2015 22:45	127.006	367.708	14.1221	3707.93
30/06/2015 22:46	112.68	92.8979	9.8969	3708.68
30/06/2015 22:47	195.578	144.964	10.7587	3724.66
30/06/2015 22:48	193.475	124.217	18.9248	3761.31
30/06/2015 22:49	147.681	50.667	11.3452	3666.9
30/06/2015 22:50	151.032	308.046	25.728	3784.2
30/06/2015 22:51	197.605	136.503	14.795	3810.62
30/06/2015 22:52	270.938	121.287	19.7555	3812.06
30/06/2015 22:53	213.077	149.342	16.7559	3811.36
30/06/2015 22:54	148.452	183.967	19.791	3702.6
30/06/2015 22:55	151.708	387.494	25.128	3844
30/06/2015 22:56	172.623	121.401	25.8214	3850.53
30/06/2015 22:57	204.373	98.1885	18.3243	3824.84
30/06/2015 22:58	172.846	173.724	12.6599	3844.98
30/06/2015 22:59	156.961	161.467	9.87264	3804.54
30/06/2015 23:00	163.107	273.414	15.3269	3919.47
30/06/2015 23:01	178.826	106.734	16.9691	3934.97
30/06/2015 23:02	185.994	134.219	16.4061	3918.25
30/06/2015 23:03	164.485	175.08	17.763	3920.69
30/06/2015 23:04	155.356	173.798	26.5928	3882.32
30/06/2015 23:05	172.499	228.963	20.7582	3970.82
30/06/2015 23:06	203.348	116.034	22.7118	3973.6
30/06/2015 23:07	245.529	147.058	16.3486	3975.52
30/06/2015 23:08	218.328	196.898	20.3598	4003.88
30/06/2015 23:09	164.653	168.899	25.6465	3899.21
30/06/2015 23:10	156.366	369.851	21.7046	4082.53
30/06/2015 23:11	187.191	116.428	26.6016	4070.09
30/06/2015 23:12	247.069	156.217	27.7148	4105.71
30/06/2015 23:13	219.269	138.598	21.3502	4115.37
30/06/2015 23:14	163.376	165.849	29.0994	4008.83
30/06/2015 23:15	146.196	360.349	28.0771	4156.74
30/06/2015 23:16	171.091	141.941	25.5594	4171.93
30/06/2015 23:17	256.159	141.206	18.7118	4205.39
30/06/2015 23:18	214.098	132.23	21.1193	4216.16
30/06/2015 23:19	151.543	138.606	21.045	4104.63
30/06/2015 23:20	155.895	370.985	23.4317	4236
30/06/2015 23:21	190.107	164.191	31.7975	4305.35
30/06/2015 23:22	197.582	69.1738	11.1383	4283.81
30/06/2015 23:23	172.861	173.763	12.9277	4277.51
30/06/2015 23:24	161.273	205.25	18.0846	4263.63
30/06/2015 23:25	169.578	228.622	26.7284	4339.54
30/06/2015 23:26	173.742	113.731	19.1736	4332.87
30/06/2015 23:27	126.66	174.305	15.6363	4365.97
30/06/2015 23:28	136.401	153.709	15.4687	4349.56
30/06/2015 23:29	152.041	202.141	33.4852	4696.59
30/06/2015 23:30	164.623	54.2217	27.1779	4655.37
30/06/2015 23:31	189.622	162.191	25.8509	4653.72
30/06/2015 23:32	237.635	184.583	21.6284	4715.5
30/06/2015 23:33	208.463	143.796	22.5784	4706.24
30/06/2015 23:34	165.052	194.842	24.531	4671.53
30/06/2015 23:35	166.557	316.373	24.8701	4807.13
30/06/2015 23:36	197.247	135.214	14.9492	4822.97
30/06/2015 23:37	268.302	160.646	18.2901	4868.14
30/06/2015 23:38	247.037	164.831	19.8356	4910.16
30/06/2015 23:39	189.736	163.922	13.9291	4824.99
30/06/2015 23:40	149.092	374.616	17.6746	4975.56
30/06/2015 23:41	159.694	181.563	26.4292	5002.92
30/06/2015 23:42	210.66	167.847	12.7087	5071.02
30/06/2015 23:43	172.315	136.629	21.2389	5137.3
30/06/2015 23:44	131.563	99.0234	15.8356	5034.96
30/06/2015 23:45	124.27	298.745	10.8776	5169.72
30/06/2015 23:46	167.471	96.5781	12.1427	5165.85
30/06/2015 23:47	264.707	139.642	14.789	5235.07
30/06/2015 23:48	236.603	93.0166	6.15022	5243.28
30/06/2015 23:49	170.373	155.412	9.97609	5136.19
30/06/2015 23:50	148.389	372.303	19.5835	5295.64
30/06/2015 23:51	197.587	169.483	11.7713	5353.66
30/06/2015 23:52	291.113	134.119	16.7351	5390.15
30/06/2015 23:53	247.578	140.2	17.6339	5436.52
30/06/2015 23:54	183.307	160.082	14.5989	5293.53
30/06/2015 23:55	171.582	425.393	11.4215	5494.67
30/06/2015 23:56	198.957	172.418	18.6355	5563.33
30/06/2015 23:57	254.348	133.533	18.7543	5591.48
30/06/2015 23:58	222.852	157.104	21.981	5593.27
30/06/2015 23:59	169.407	185.179	16.9878	5513.27
01/07/2015 00:00	157.529	341.645	18.4367	5663.82
01/07/2015 00:01	175.441	165.515	16.1555	5721.85
01/07/2015 00:02	243.099	131.886	20.8403	5743.36
01/07/2015 00:03	234.193	153.343	8.53326	5788.34
01/07/2015 00:04	192.446	148.656	19.4169	5694.2
01/07/2015 00:05	181.358	336.38	22.8677	5827.84
01/07/2015 00:06	202.823	189.688	21.7568	5868.67
01/07/2015 00:07	294.651	164.537	12.7519	5897.02
01/07/2015 00:08	272.688	176.231	16.4236	5914.11
01/07/2015 00:09	203.843	186.207	20.9681	5844.28
01/07/2015 00:10	154.468	375.551	21.1596	5983.95
01/07/2015 00:11	171.279	231.032	16.2825	6056.75
01/07/2015 00:12	297.007	153.253	12.5408	6081.53
01/07/2015 00:13	256.553	163.698	25.0316	6193.87
01/07/2015 00:14	187.427	67.0322	14.4411	5958.56
01/07/2015 00:15	199.4	466.271	20.9322	6192.13
01/07/2015 00:16	256.453	175.092	18.2078	6274.01
01/07/2015 00:17	328.647	130.029	16.9691	6286.12
01/07/2015 00:18	278.064	221.834	15.1416	6348.31
01/07/2015 00:19	213.606	222.927	11.8752	6192.04
01/07/2015 00:20	189.665	478.41	8.11916	6490.72
01/07/2015 00:21	206.954	157.272	16.6471	6515.43
01/07/2015 00:22	282.037	189.192	15.0329	6575.5
01/07/2015 00:23	256.936	166.965	29.3986	6586.21
01/07/2015 00:24	202.356	176.776	23.2936	6473.17
01/07/2015 00:25	208.666	403.041	24.3868	6705.27
01/07/2015 00:26	233.167	164.683	17.381	6714.95
01/07/2015 00:27	238.632	174.8	16.3152	6717.54
01/07/2015 00:28	215.632	220.198	12.5728	6752.88
01/07/2015 00:29	175.426	227.867	4.67934	6727.85
01/07/2015 00:30	147.207	298.103	15.0276	6865.31
01/07/2015 00:31	171.776	186.492	15.3457	6977.73
01/07/2015 00:32	254.53	148.078	29.6978	7053.73
01/07/2015 00:33	234.838	116.939	23.6795	7097.07
01/07/2015 00:34	190.093	139.587	20.92	6970.81
01/07/2015 00:35	149.266	343.119	15.0281	7148.92
01/07/2015 00:36	170.039	192.716	14.5303	7236.36
01/07/2015 00:37	258.32	160.882	18.839	7297.26
01/07/2015 00:38	225.69	141.799	24.3975	7404.69
01/07/2015 00:39	164.899	103.175	11.7374	7235.71
01/07/2015 00:40	149.636	386.873	14.1041	7497.97
01/07/2015 00:41	200.944	148.805	24.4823	7574.73
[truncated: 17,644 more rows]
